# Supplementary material for: Heterogeneous pseudobulk simulation enables realistic benchmarking of cell-type deconvolution methods
Source: PubMed Central journal article supplement (PMC11218230; doi:10.1186/s13059-024-03292-w), 2024-07-01
Supplement: 13059_2024_3292_MOESM1_ESM.pdf [file 13059_2024_3292_MOESM1_ESM.pdf]

## Additional file 1: Supplementary Figures

Fig S1. Schematic framework of the benchmarking study

Fig S2. Schematic representation of heterogeneous bulk simulation

Fig S3. Comparison of fraction simulation strategies

Fig S4. Comparison of different bulk simulation strategies: Heatmap visualization of pairwise gene correlations

Fig S5. Comparison of different bulk simulation strategies: Variance in biological pathways

Fig S6. Comparison of different bulk simulation strategies: Scatter plot of variance comparison

Fig S7. Comparison of different bulk simulation strategies: Distribution of sample-wise correlations

Fig S8. Heterogeneity in malignant cells

Fig S9. Heterogeneity in non-malignant cells

Fig S10. Overall RMSE for regression-based methods under various simulation settings

Fig S11. Robust regression methods show similar sensitivity to changes in heterogeneity levels

Fig S12. Overall RMSE for marker-based methods under various simulation settings

Fig S13. Gsva score estimates correlate non-linearly with ground truth fraction

Fig S14. Pearson correlation of xCell signatures with ground truth fraction

Fig S15. Overall RMSE comparison under homogeneous and heterogeneous conditions

Fig S16. Detailed performance comparison under heterogeneous simulation

Fig S17. BayesPrism using initial vs updated reference

Fig S18. Pairwise correlation between fraction estimates and ground truth fractions facilitates cell-type mapping in reference-free methods

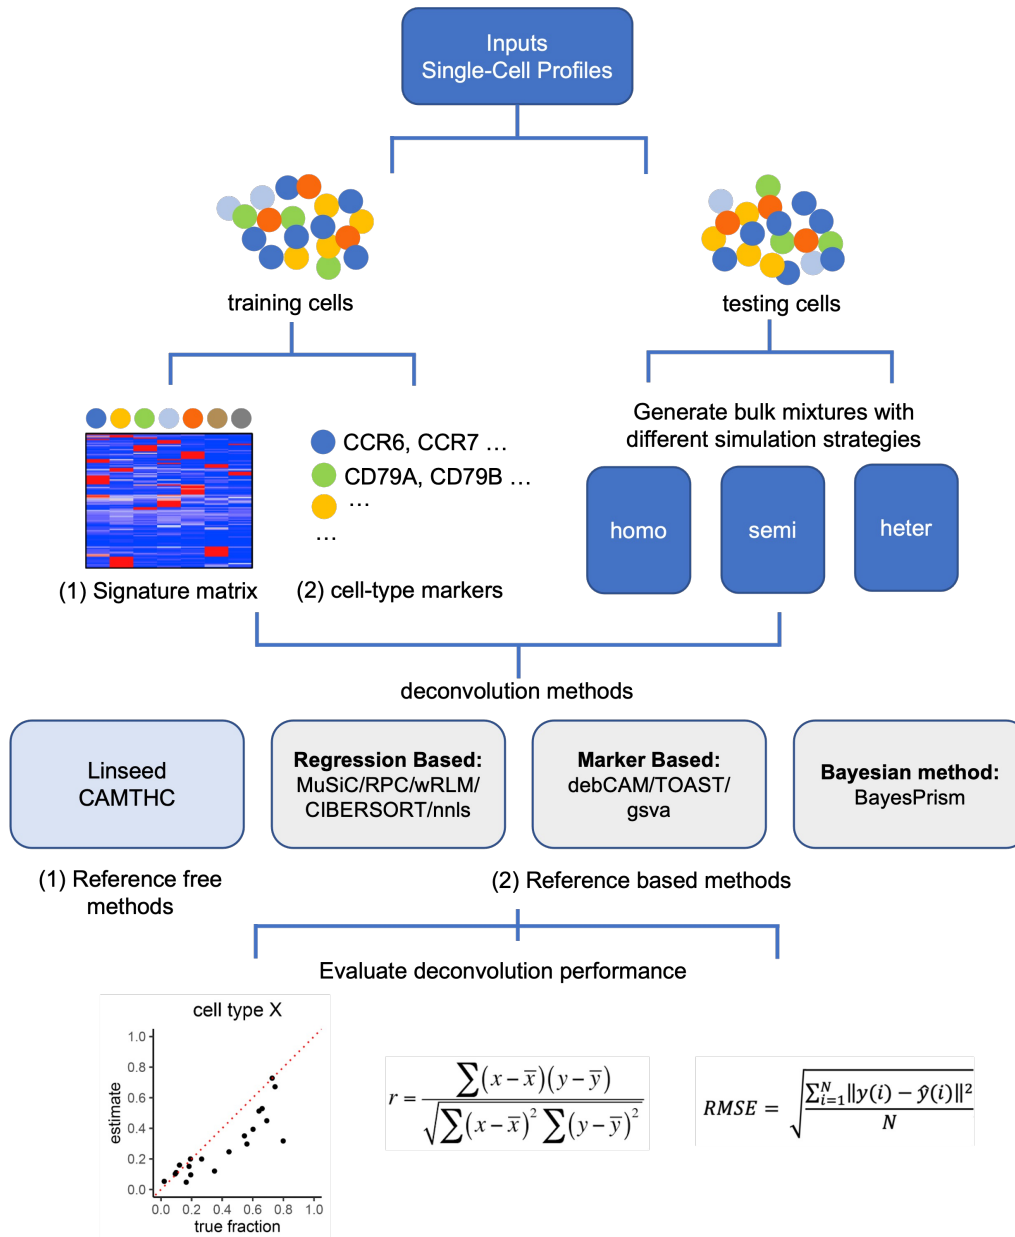

### Fig S1. Schematic framework of the benchmarking study

The complete framework involves the following steps: **(1)** The benchmarking framework takes the single-cell expression matrix and predefined cell-type labels as input. **(2)** Single cell profiles are then split into training (50%) and testing (50%) sets. **(3)** Training set is used to create reference signature matrices consisting of informative marker gene expression, and cell-type marker list that can discriminate between different cell-types. Testing set is used to build simulated bulk samples using three different simulation strategies: homogeneous (homo), semi-heterogeneous (semi) and heterogeneous (heter) simulation. **(4)** Four categories of deconvolution methods are implemented: reference-free methods, regression-based methods, marker-based methods and Bayesian method. **(5)** Performance of different deconvolution methods is evaluated by comparing between the estimated and known fraction using the following statistics: Pearson correlation coefficient, root mean square error (RMSE).

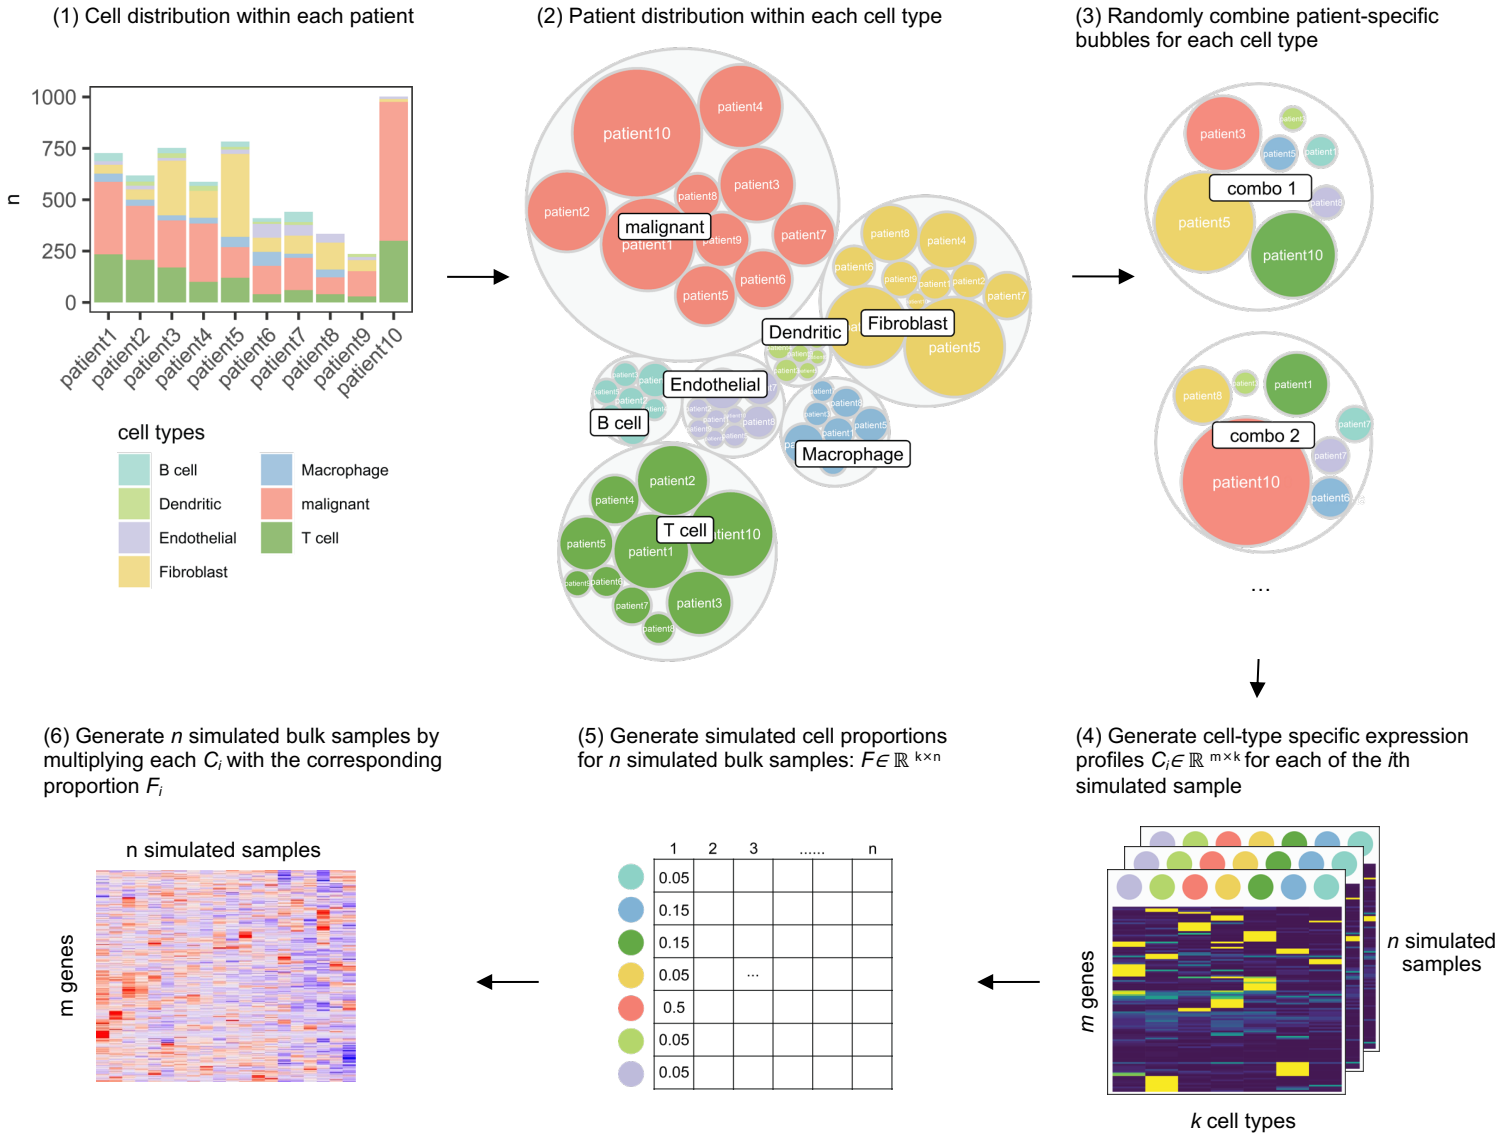

**Fig S2. Schematic representation of heterogeneous bulk simulation**

Heterogeneous bulk simulation involves the following steps: (1) cell-type distribution is first summarized at per patient level; (2) Patient barcode information is summarized at per cell-type level; (3) For each of the  $i$ th simulated sample, out of  $n$  total samples, single cells are randomly selected and aggregated. This selection is constrained such that each cell type comes from the same biological sample. For example, in the first simulated sample ("combo 1"), fibroblasts are randomly selected from Patient 5, malignant cells from Patient 3, etc. All single cells selected for "combo 1" are then used to construct this simulated sample; (4) Using the aggregated single cells from Step 3, we create cell-type specific expression profiles  $C_i$  for each combination of cells (referred to as "combo"). Specifically, for each "combo", we take the average expression values of single cells from the same cell type to get the cell-type specific expression profiles  $C_i \in \mathbb{R}^{m \times k}$  for the  $i$ th simulated sample. This process results in  $n$  individual cell-type specific expression profiles  $C_i$ ; (5) Simulate cell-type proportions; (6) Each cell-type specific expression profile  $C_i$  is weighted by cell-type proportions  $F$  to yield the final heterogeneously simulated bulk expression.

### Puram2017\_HNSCC

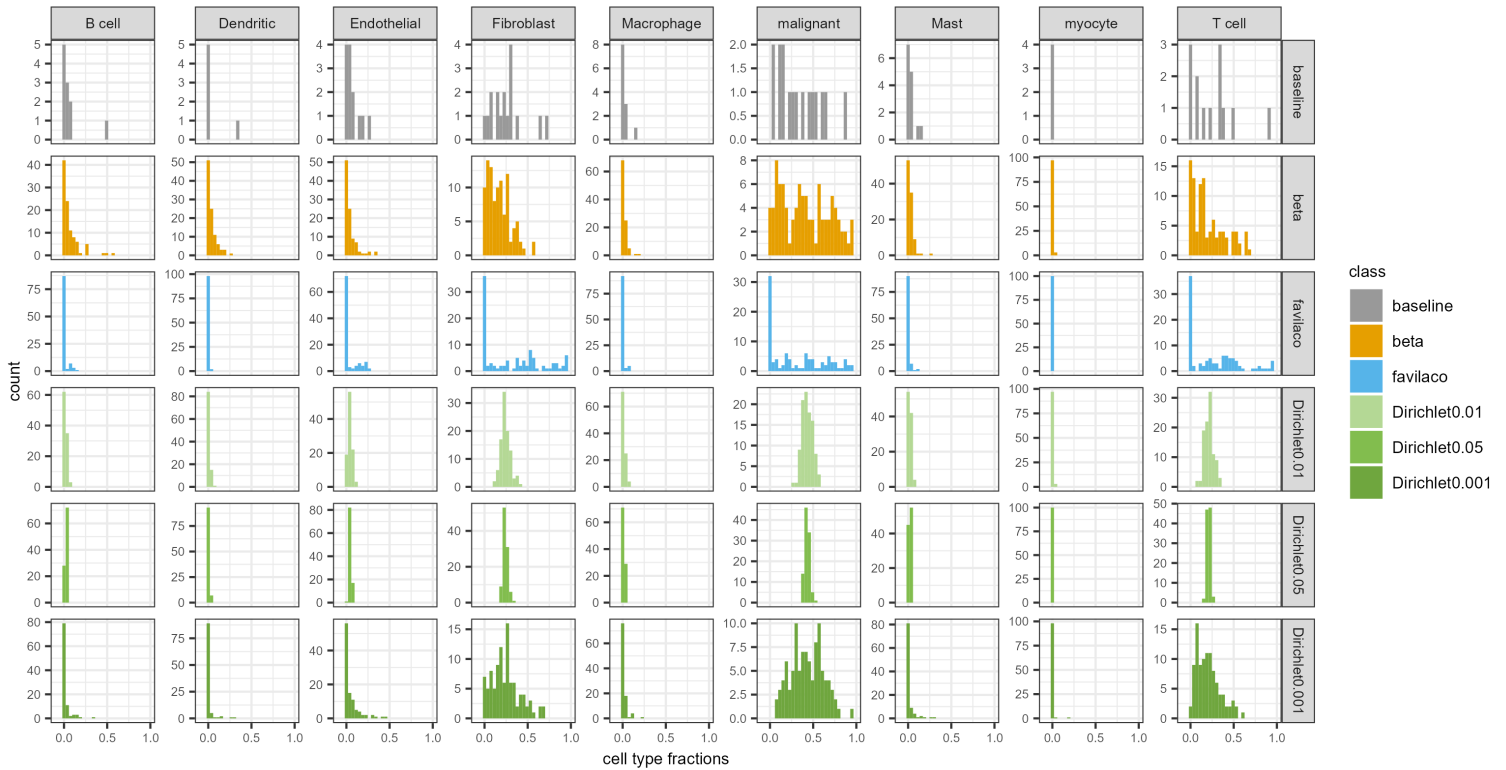

**Fig S3. Comparison of fraction simulation strategies**

Histogram comparing the distribution of cell-type proportions from an example dataset. The first row shows the cell-type proportions of each patient from the scRNA dataset, serving as a baseline for fraction comparison. The second row corresponds to beta-distribution based fraction simulation. This fraction simulation method is applied to bulk simulation throughout this study. Additional rows showcase the distribution of cell-type fractions obtained from alternative methods: the approach adopted by Avila Cobos et al. (labeled as “favilaco”), and the simulation from a Dirichlet distribution with varying levels of dispersion parameters.

a

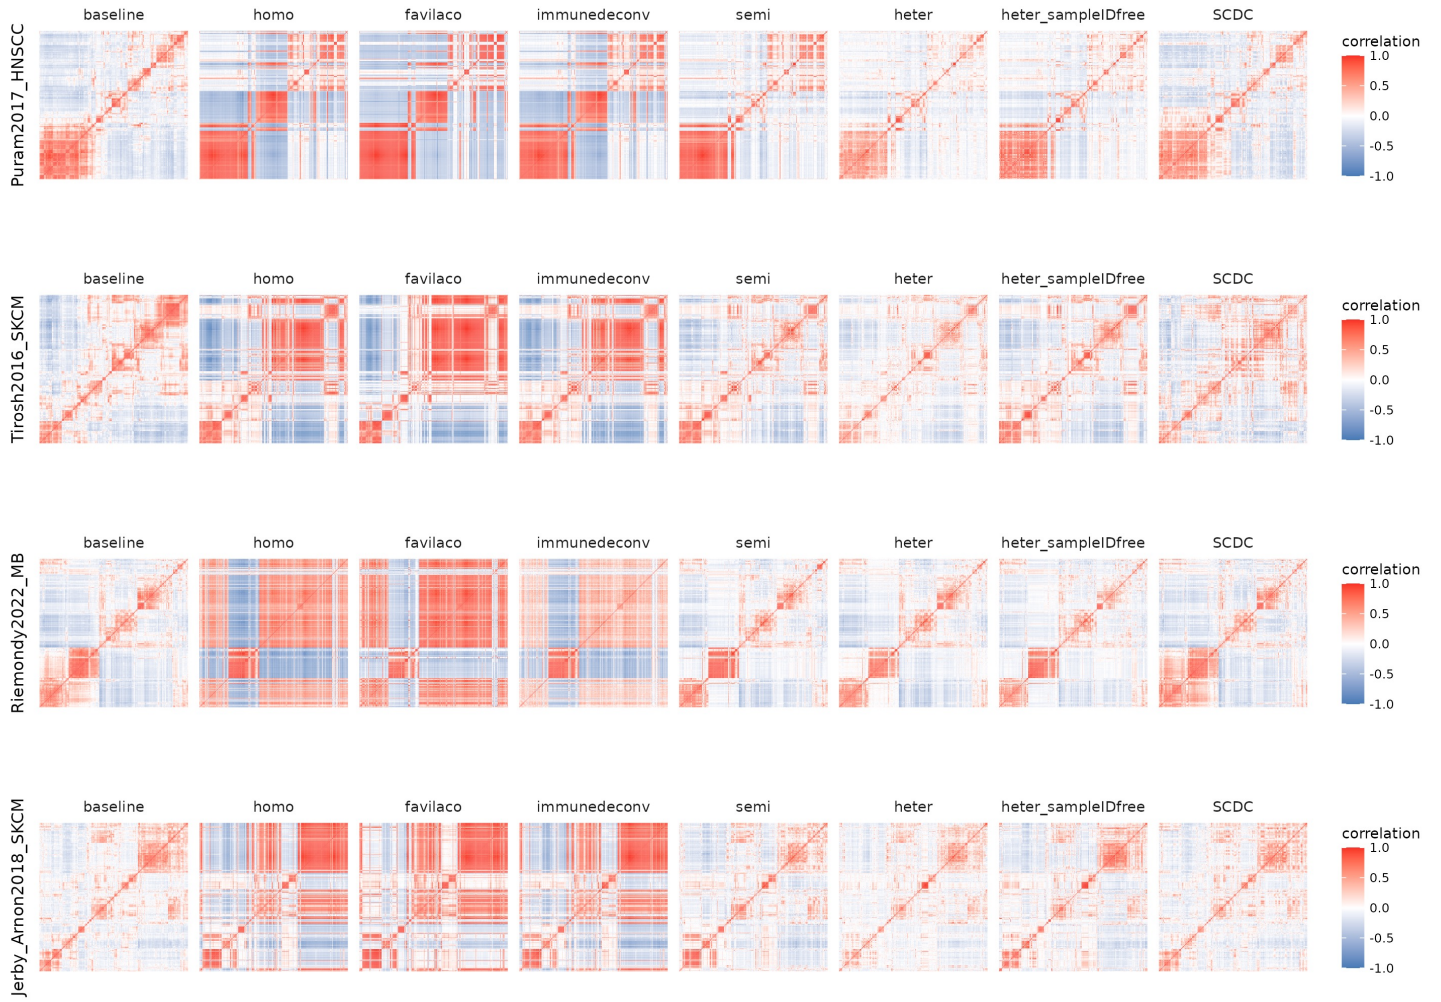

**b**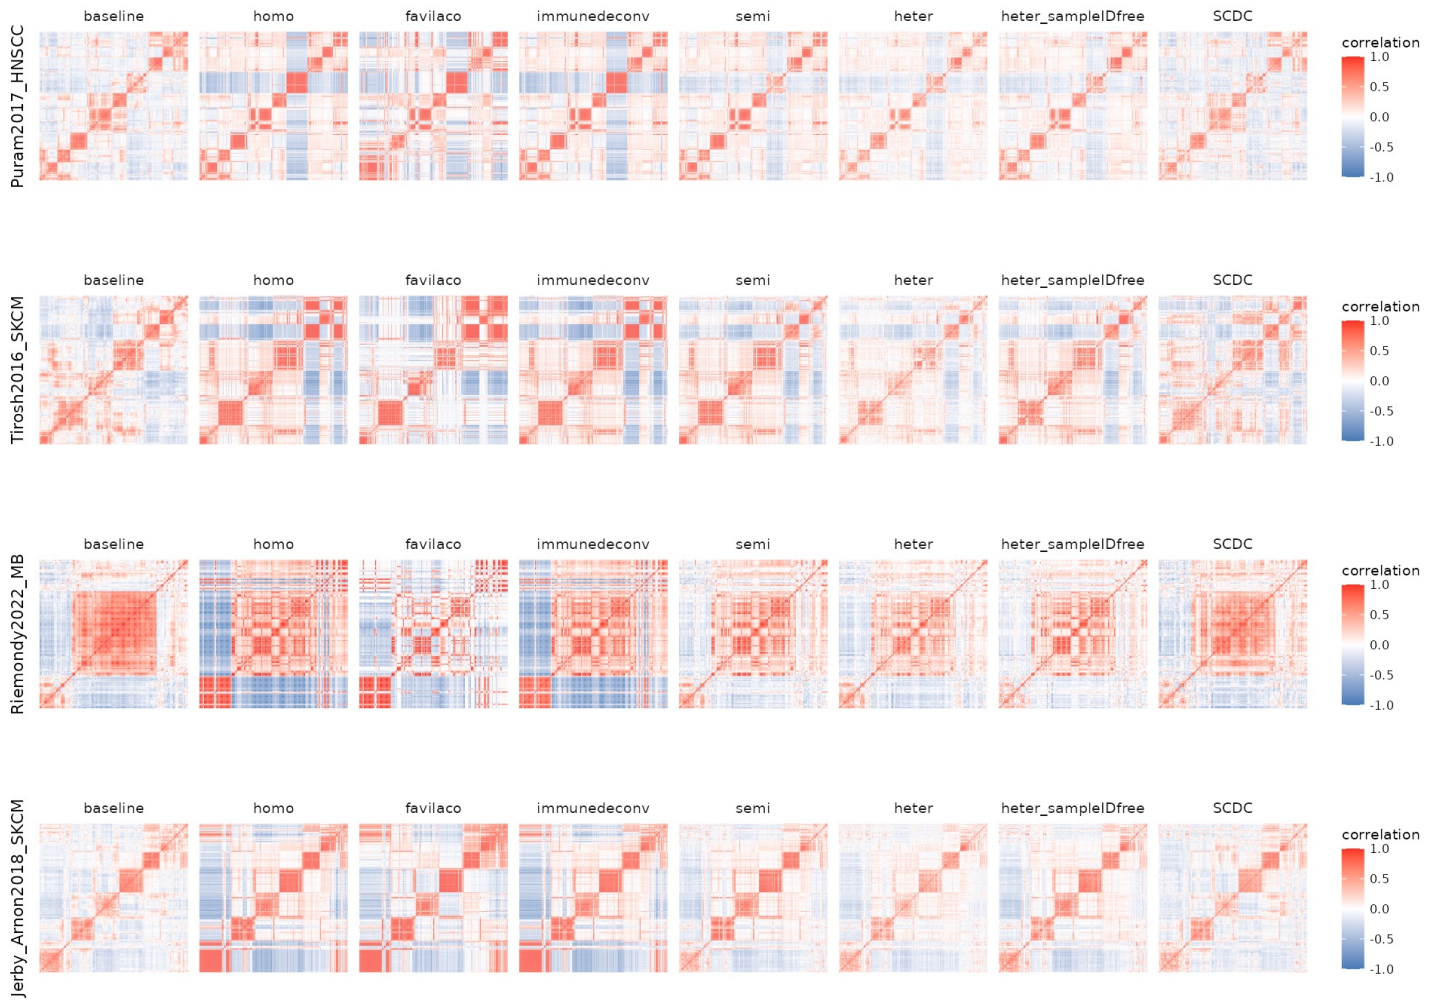

**Fig S4. Comparison of different bulk simulation strategies: Heatmap visualization of pairwise gene correlations**  
Heatmap showing gene correlations in baseline and simulated bulk expression across datasets. The baseline bulk expression is obtained from aggregated cells of the same patient in the single-cell cohort, as an approximation of real bulk expression. Each simulated bulk expression profile consists of 100 simulated samples. The **(a)** top 300 most variable genes from the baseline expression and **(b)** cell-type marker genes (derived from limma-based DE analysis) are selected for gene correlation comparison.

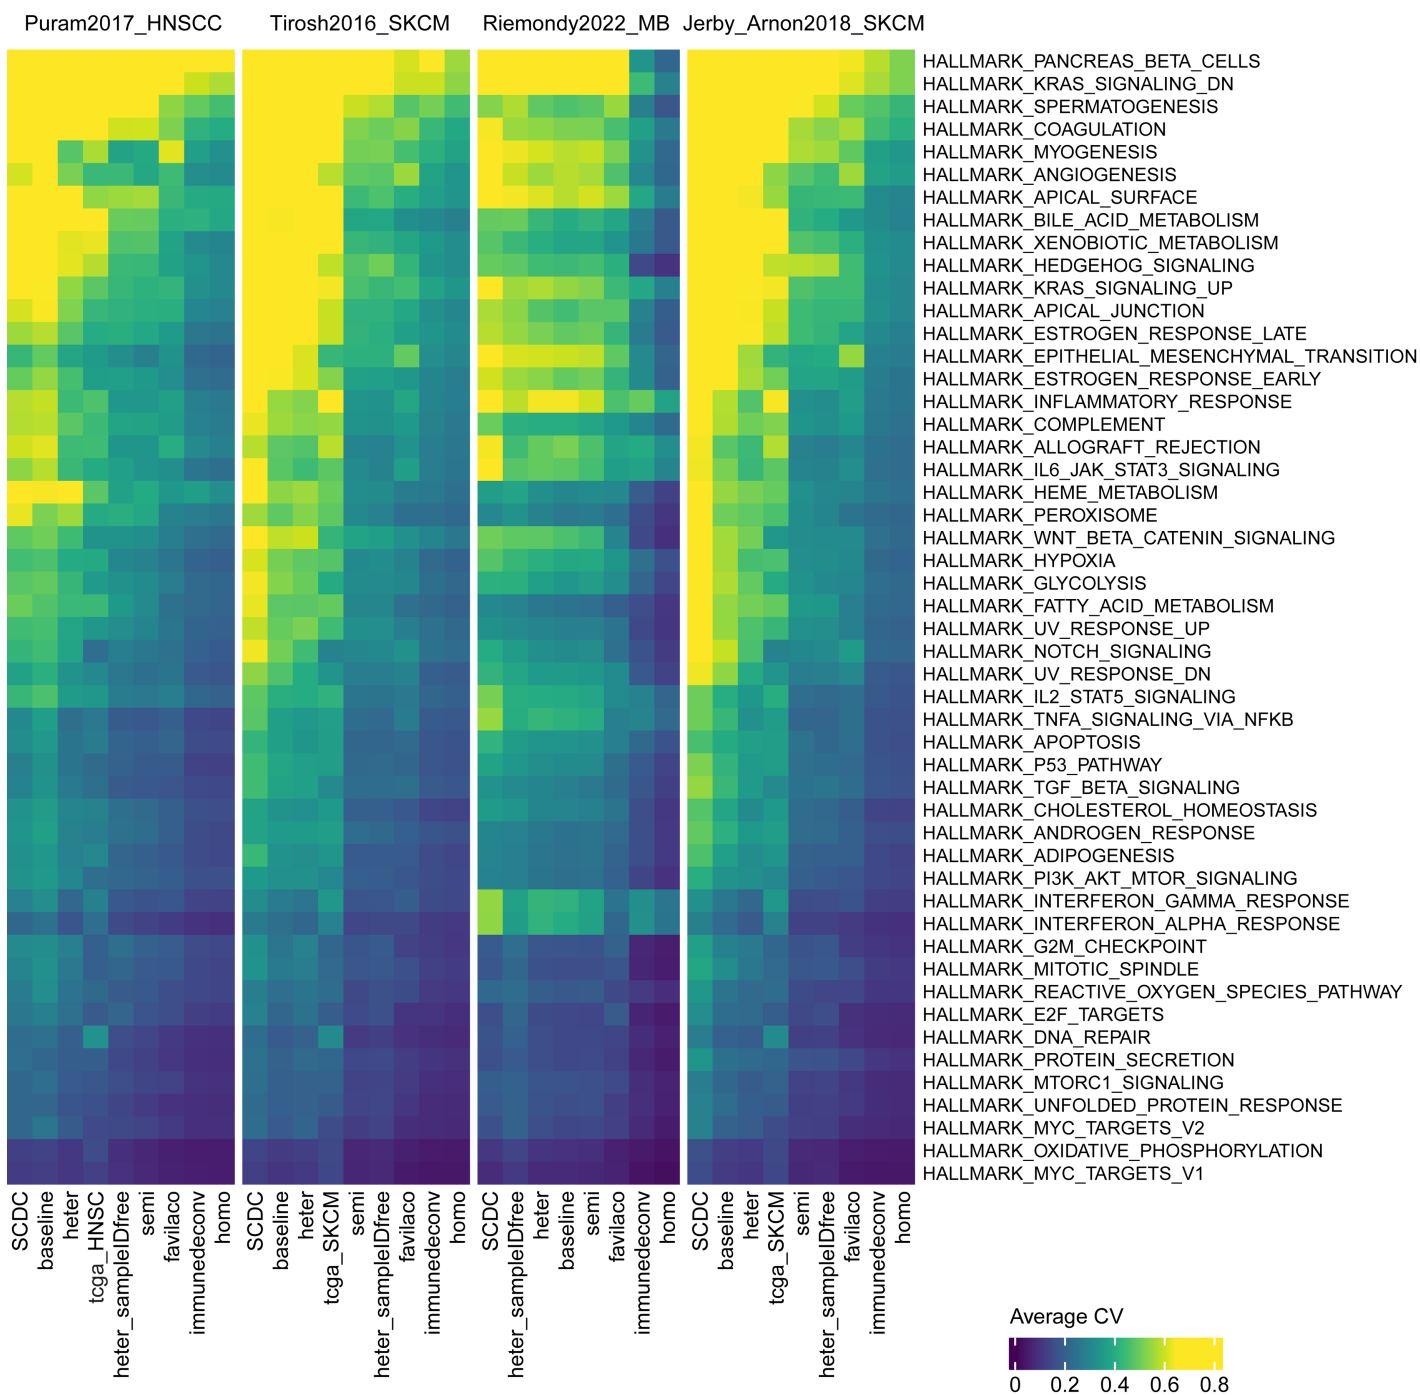

**Fig S5. Comparison of different bulk simulation strategies: Variance in biological pathways**

Heatmap comparing average coefficients of variance (CV) for genes from all 50 hallmark pathways, as an illustration of biological variations. The columns denote baseline and simulated bulk expression, along with real bulk expression profiles from TCGA when paired tumor type is available.

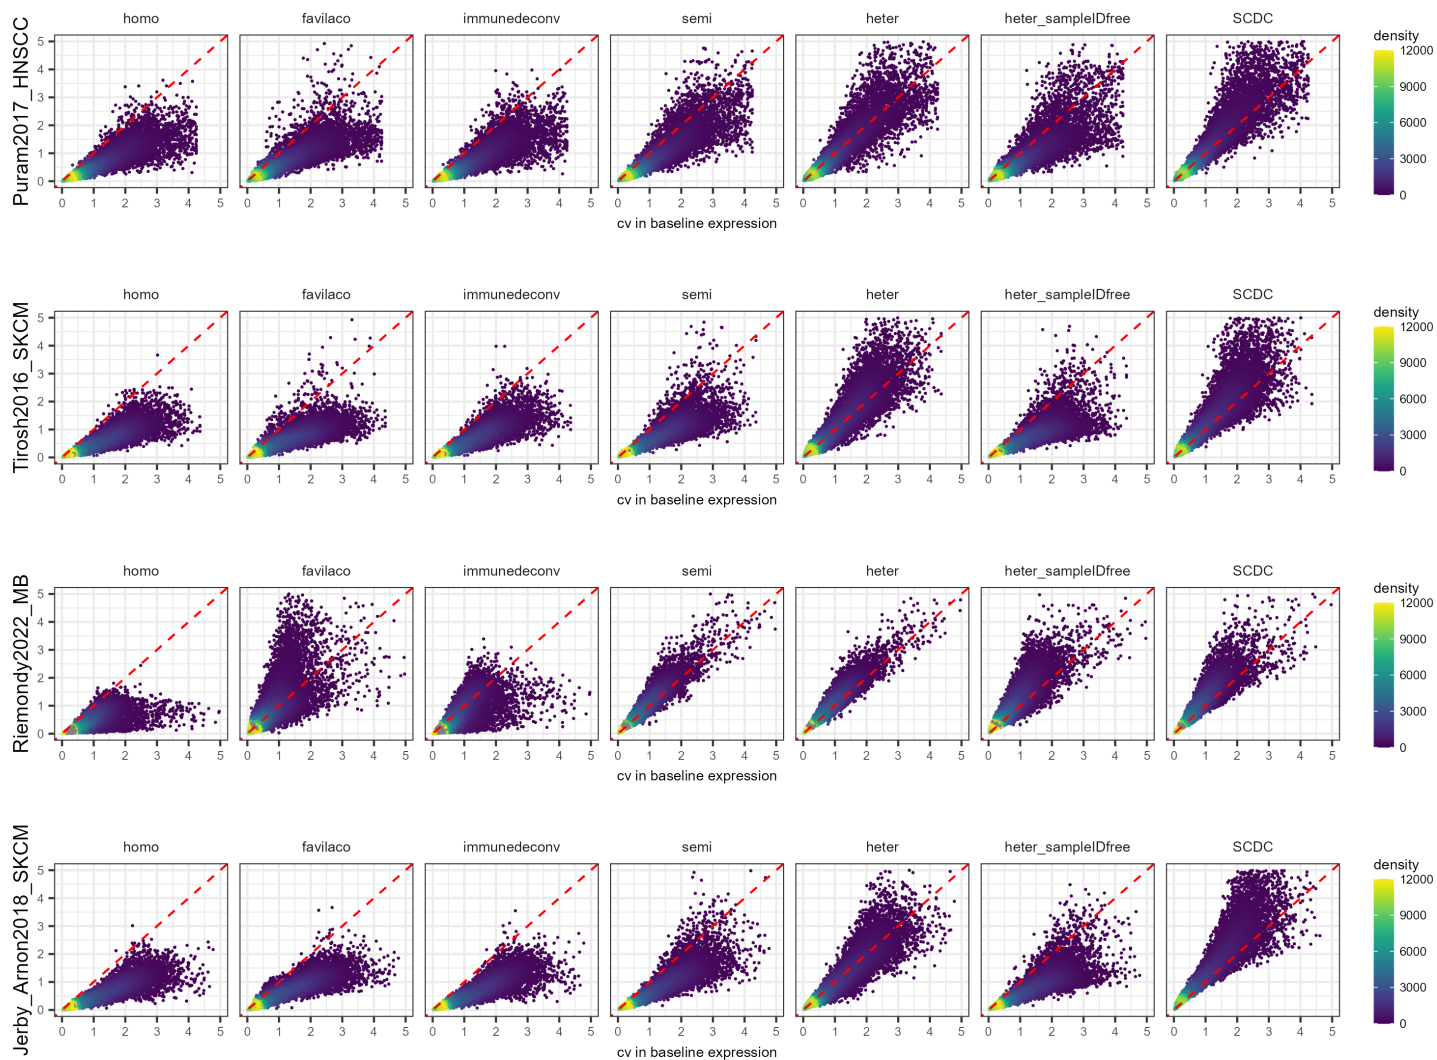

**Fig S6. Comparison of different bulk simulation strategies: Scatter plot of variance comparison**

Scatter plots comparing coefficients of variation (CV) for all genes between simulated and baseline expression, where the expression profiles are obtained using the same procedure as in FigS4.



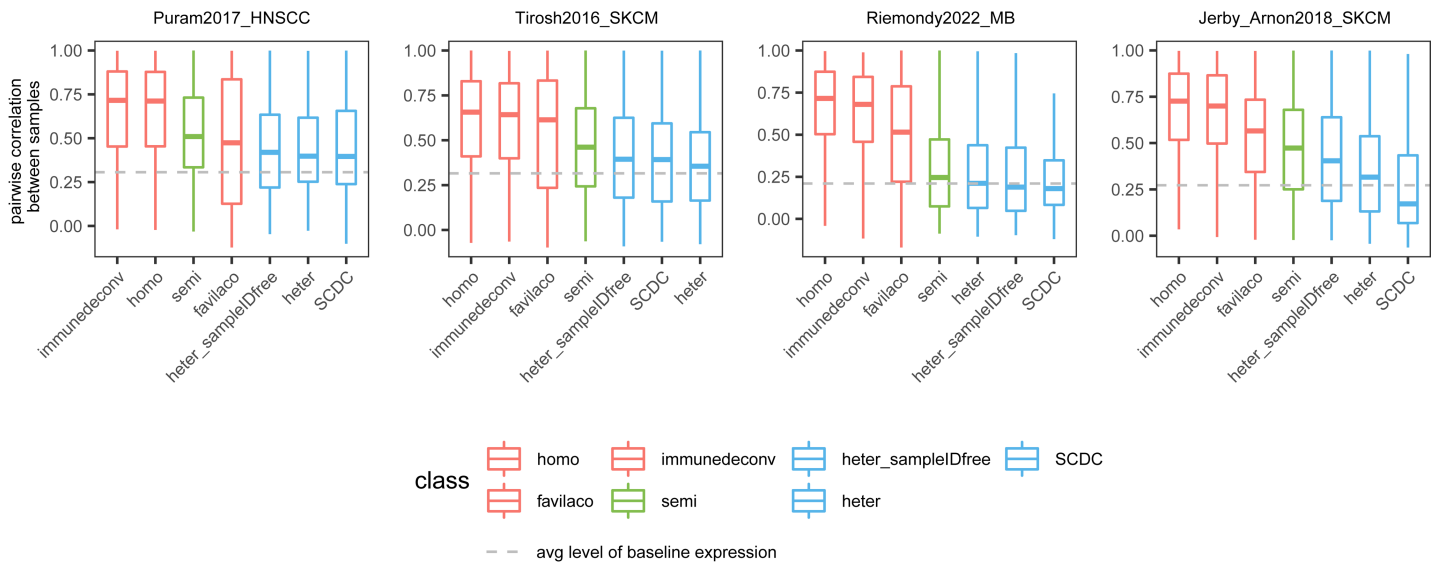

**Fig S7. Comparison of different bulk simulation strategies: Distribution of sample-wise correlations**  
 Boxplot comparing pairwise correlations between simulated bulk samples, with the dashed line indicating the average pairwise correlation in baseline expression.

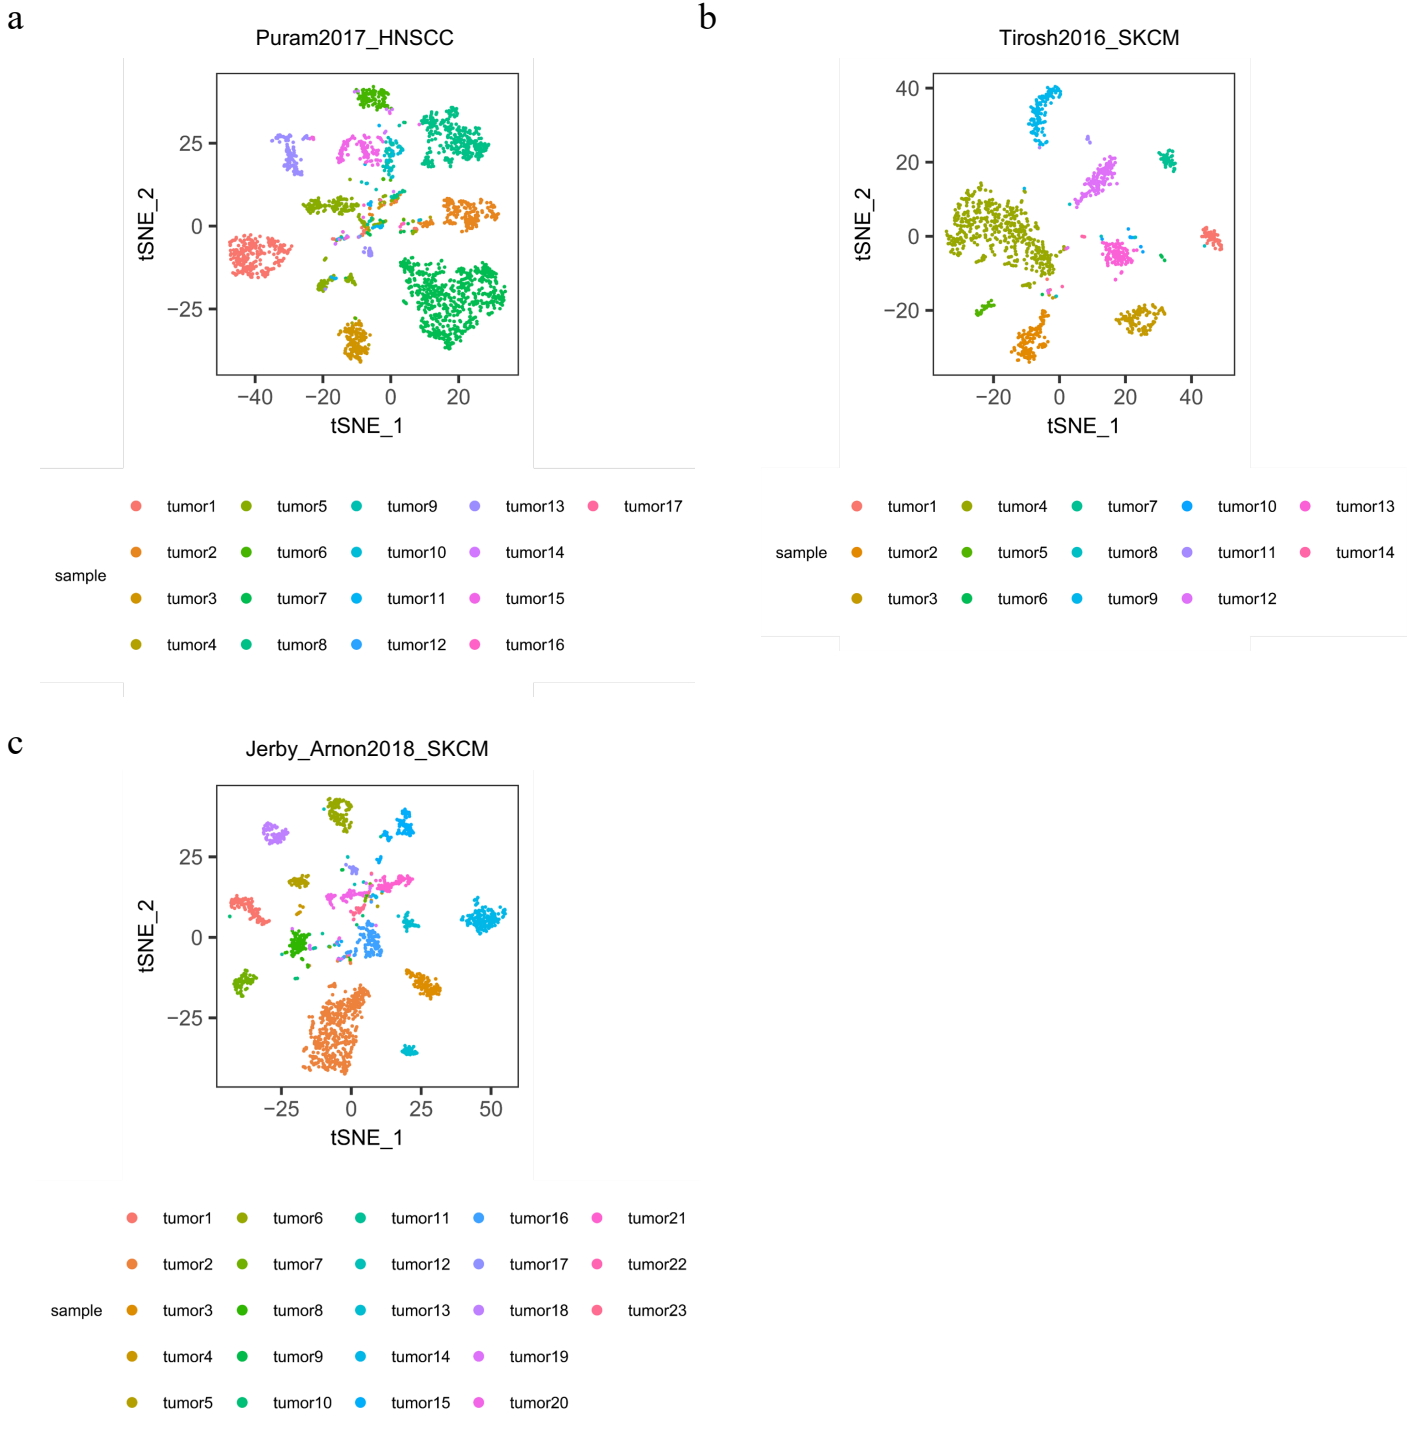

**Fig S8. Heterogeneity in malignant cells**

(a-c) tSNE plot of malignant cells from Puram2017\_HNSCC dataset (n=2,539), Tirosh2016\_SKCM dataset (n=1,310) and Jerby\_Arnon2018\_SKCM dataset (n=2,018), colored by patient identifiers.

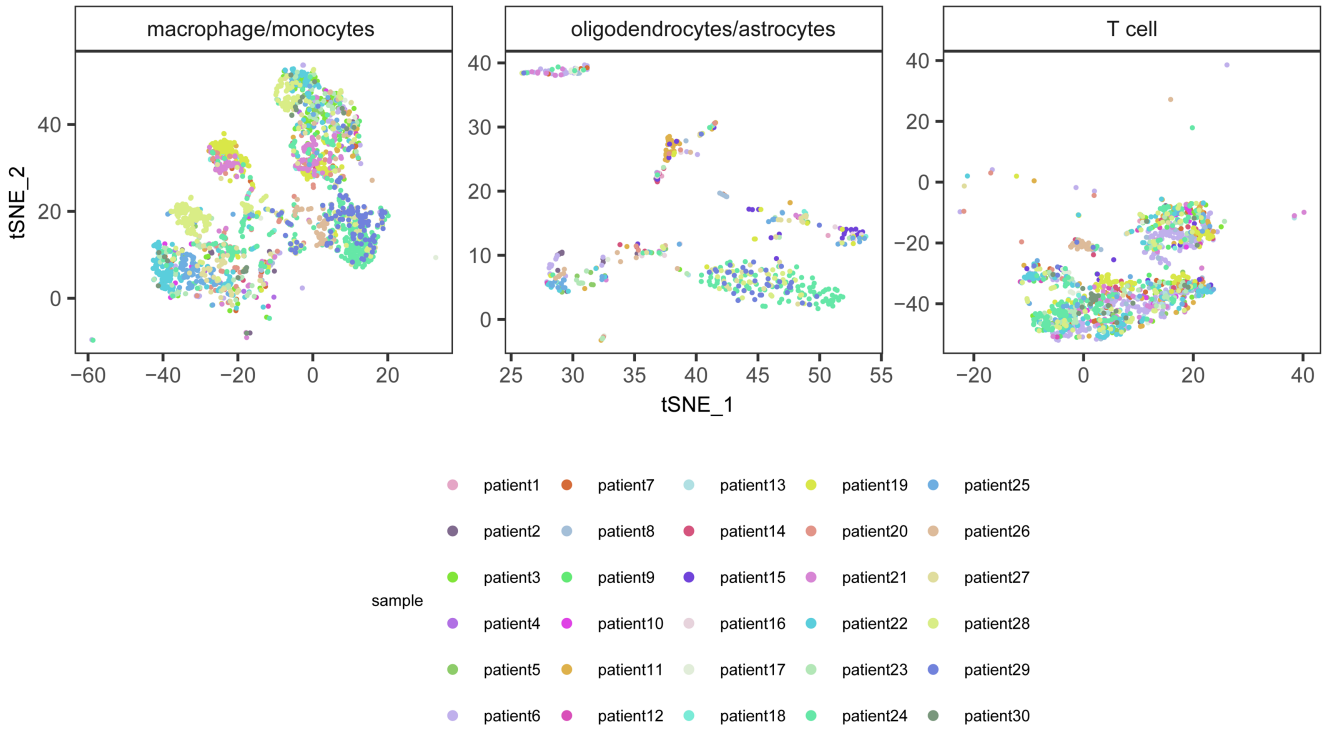

**Fig S9. Heterogeneity in non-malignant cells**

tSNE plot of non-malignant cells from the Riemondy2022\_MB dataset, colored by patient identifiers. Representative cell-types with  $n > 500$  cells are shown in this plot (macrophage/monocytes:  $n = 2107$ , oligodendrocytes/astrocytes:  $n = 539$ , T cell:  $n = 1344$ ).

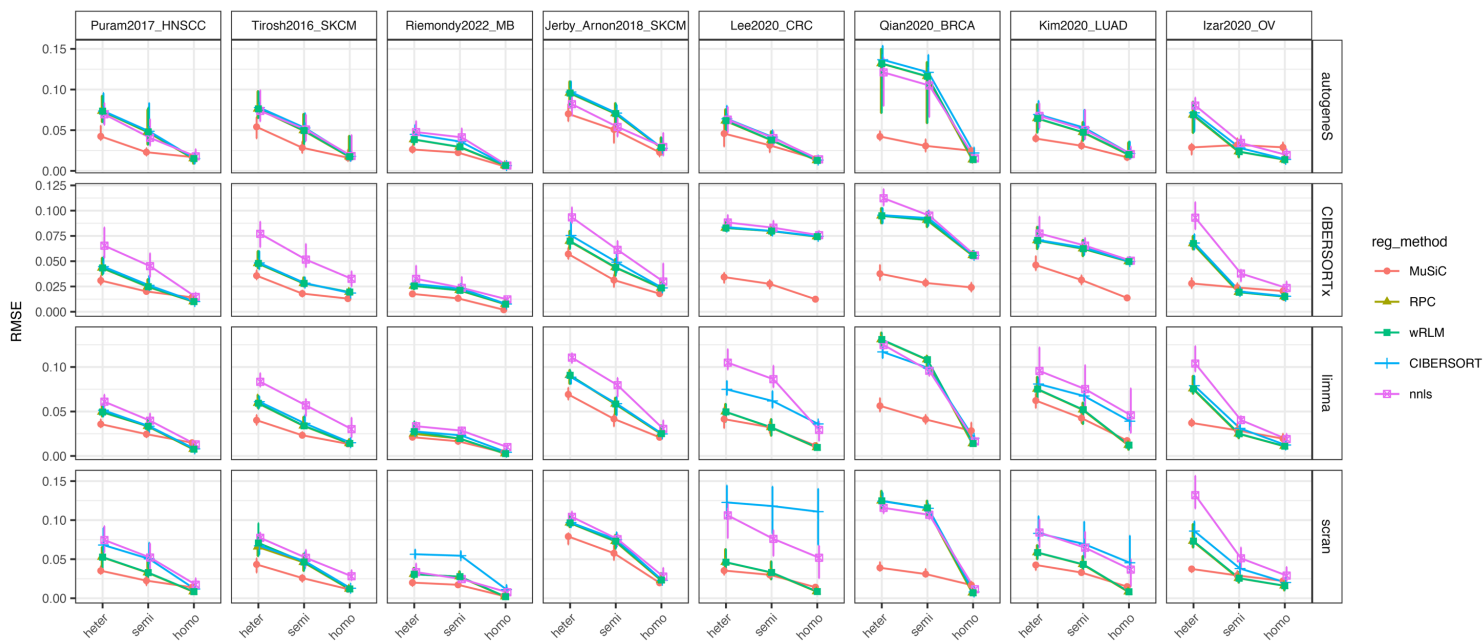

**Fig S10. Overall RMSE for regression-based methods under various simulation settings**

Line plot comparing performance of regression-based methods under various simulation strategies across eight different datasets. Performance is assessed using RMSE values, with lower RMSE corresponds to higher performance. The error bars indicate the min and max level of RMSE over 10 experimental repeats. Each row corresponds to a different method to generate the reference matrices.

a

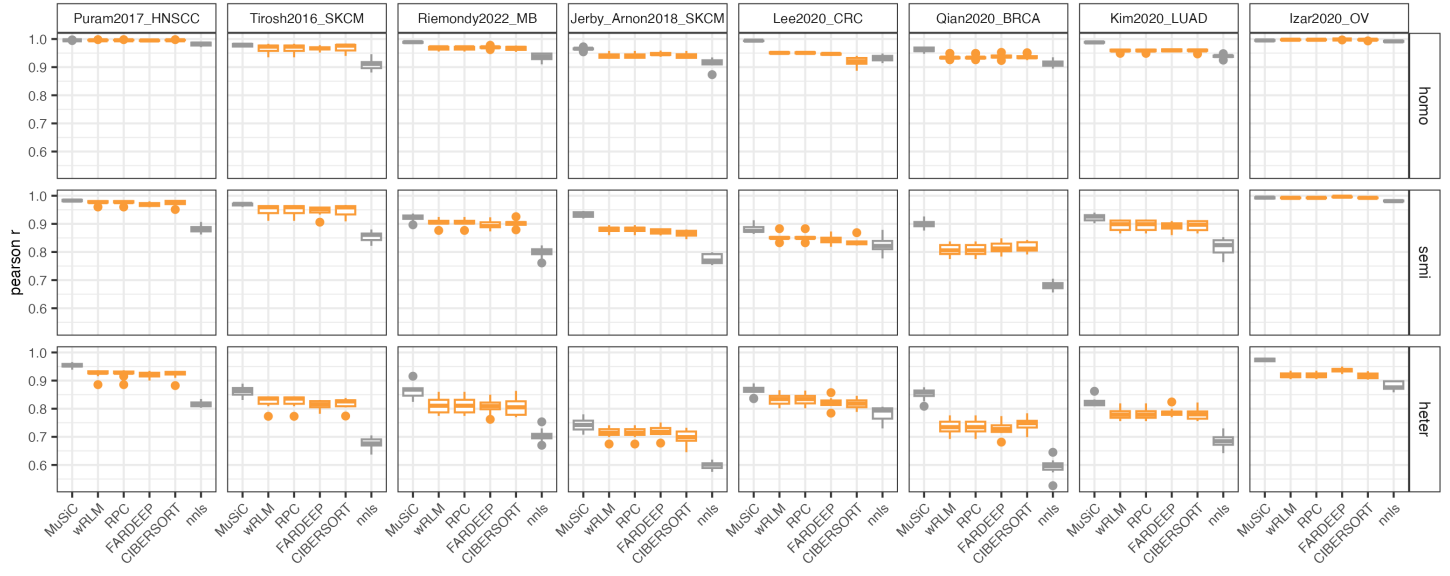

b

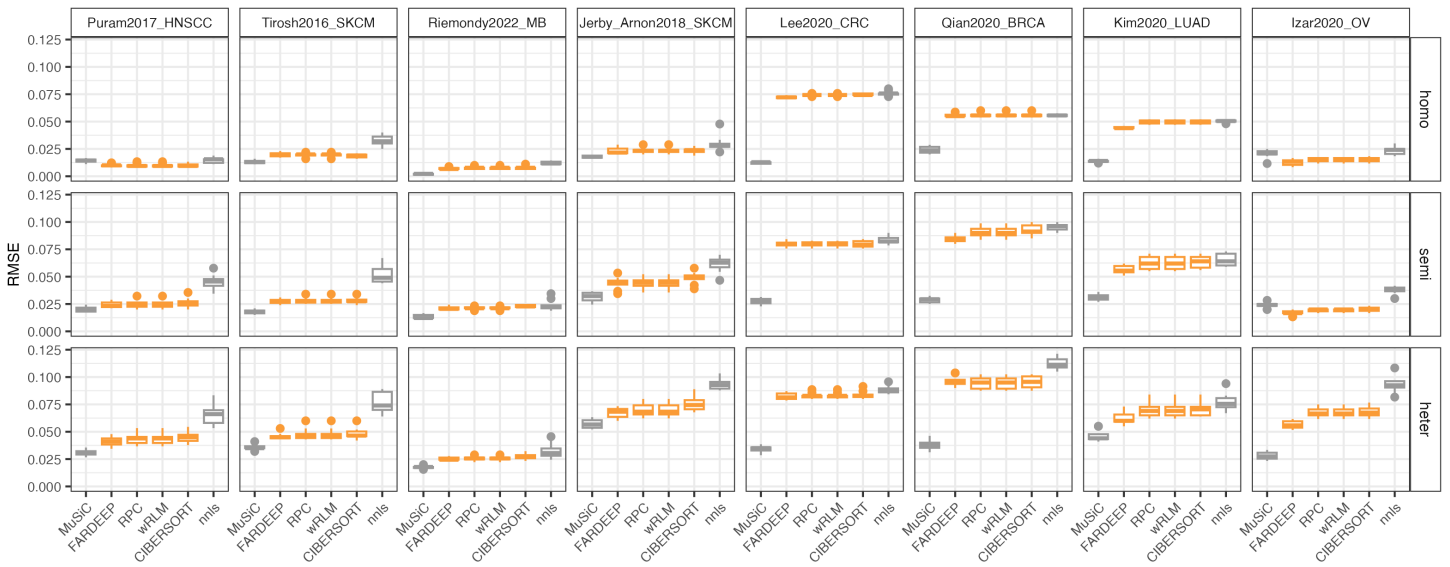

**Fig S11. Robust regression methods show similar sensitivity to changes in heterogeneity levels**

Boxplot showing the distribution of (a) Pearson correlation and (b) RMSE values of different regression methods across experimental repeats, using CIBERSORTx derived reference matrix as input. Robust regression methods are highlighted in yellow.

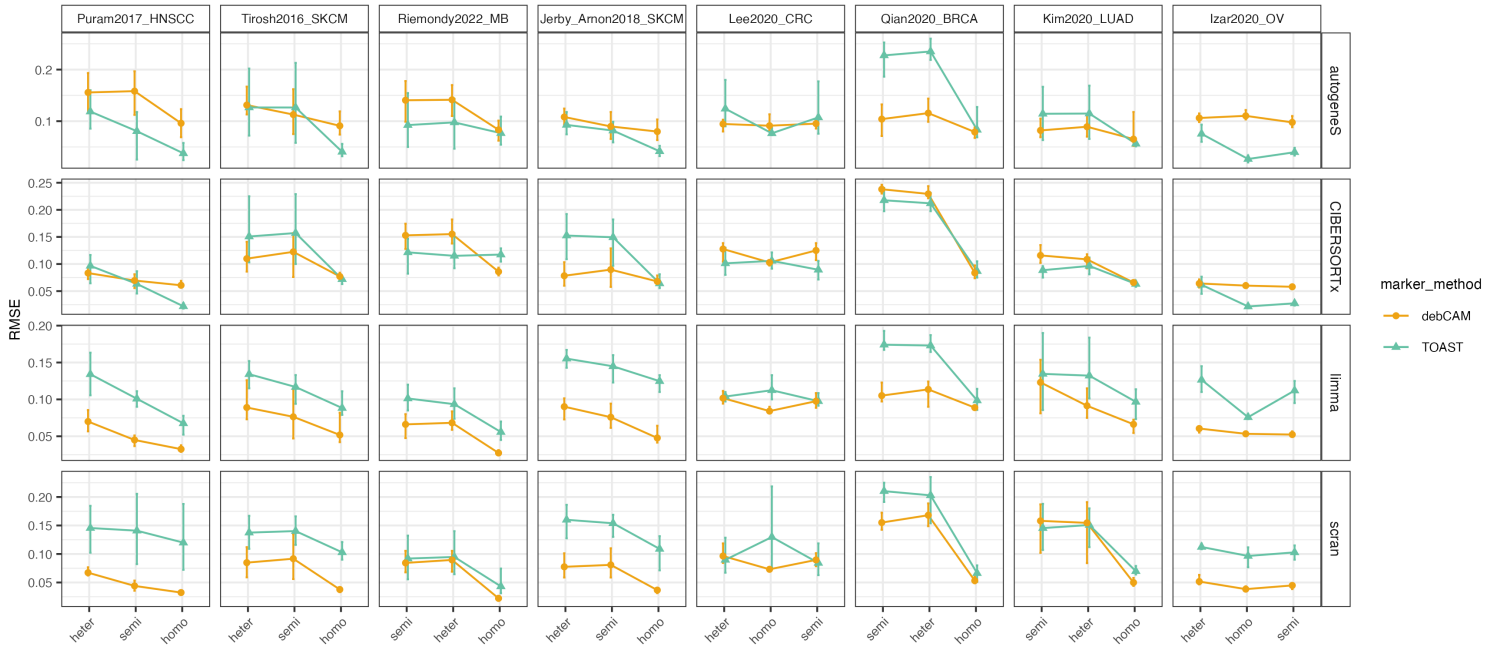

**Fig S12. Overall RMSE for marker-based methods under various simulation settings**

Line plot comparing performance of marker-based methods under various simulation strategies across eight different datasets. Performance is assessed using RMSE values, with lower RMSE corresponds to higher performance. The error bars indicate the min and max level of RMSE over 10 experimental repeats. Each row corresponds to a different method to generate the marker-list. Only marker-based methods with the sum-to-one constraint are included in this figure.

a

Puram2017\_HNSCC

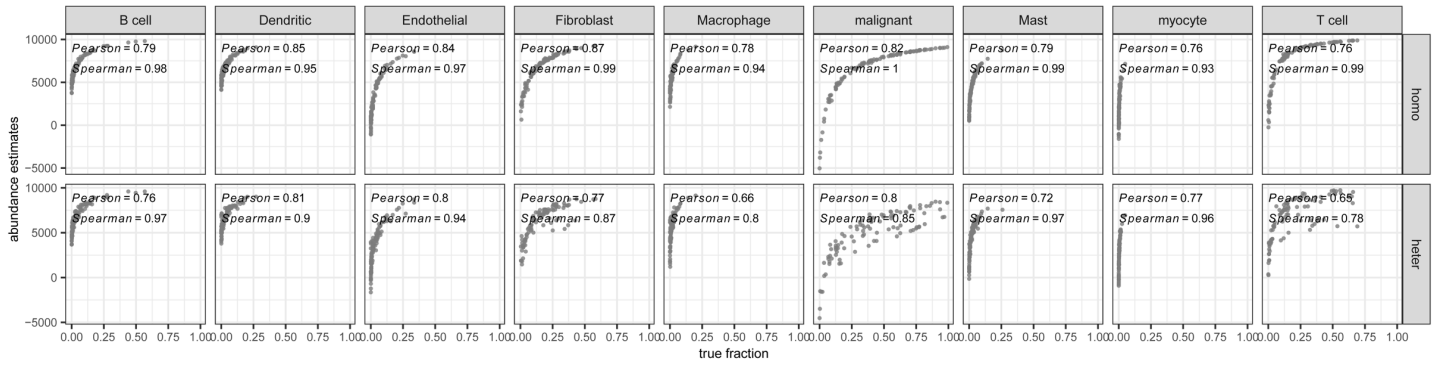

b

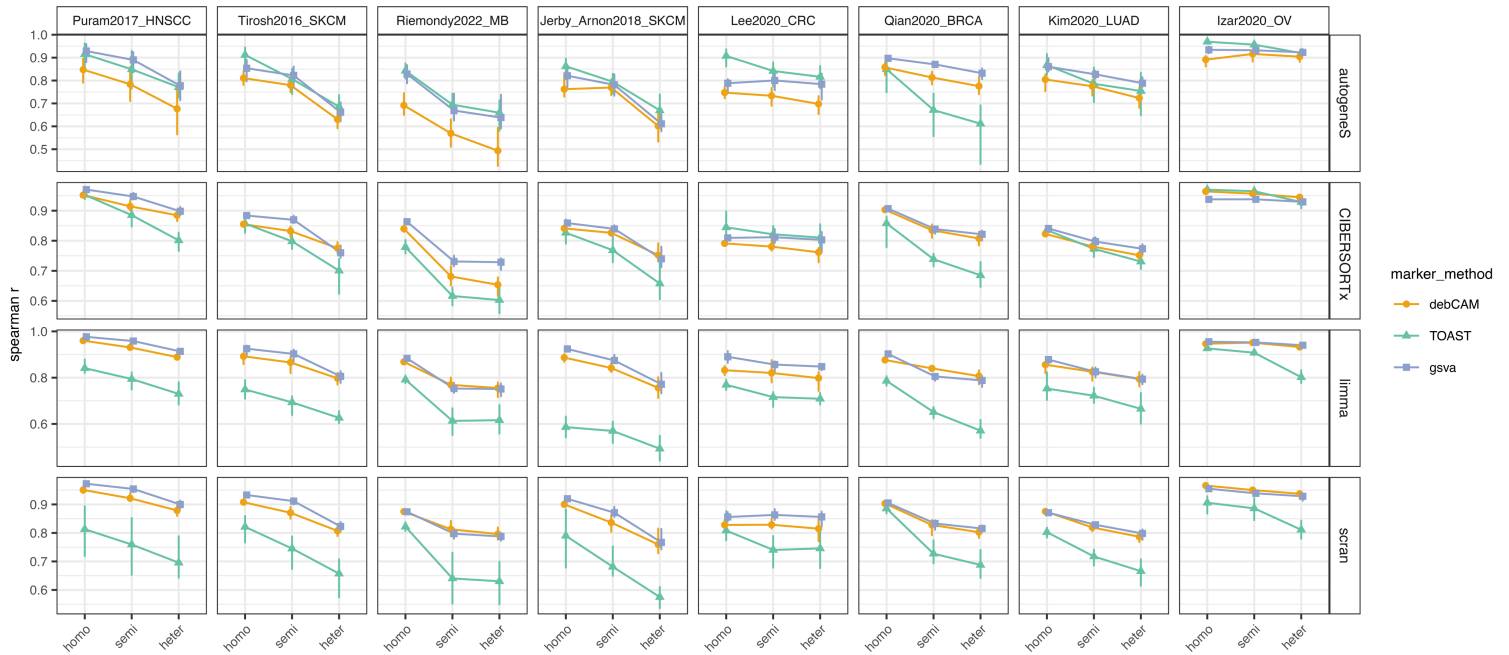

**Fig S13. Gsva score estimates correlate non-linearly with ground truth fraction**

(a) Scatter plot showing the performance of gsva under homo and heter simulation in one example dataset, with ground truth cell type fraction on x axis and the predicted scores on y axis. (b) Line plot showing the average spearman correlation of marker-based methods under different simulation strategies across eight different datasets, with the error bars correspond to the min and max level of spearman correlation over 10 experimental repeats.

a

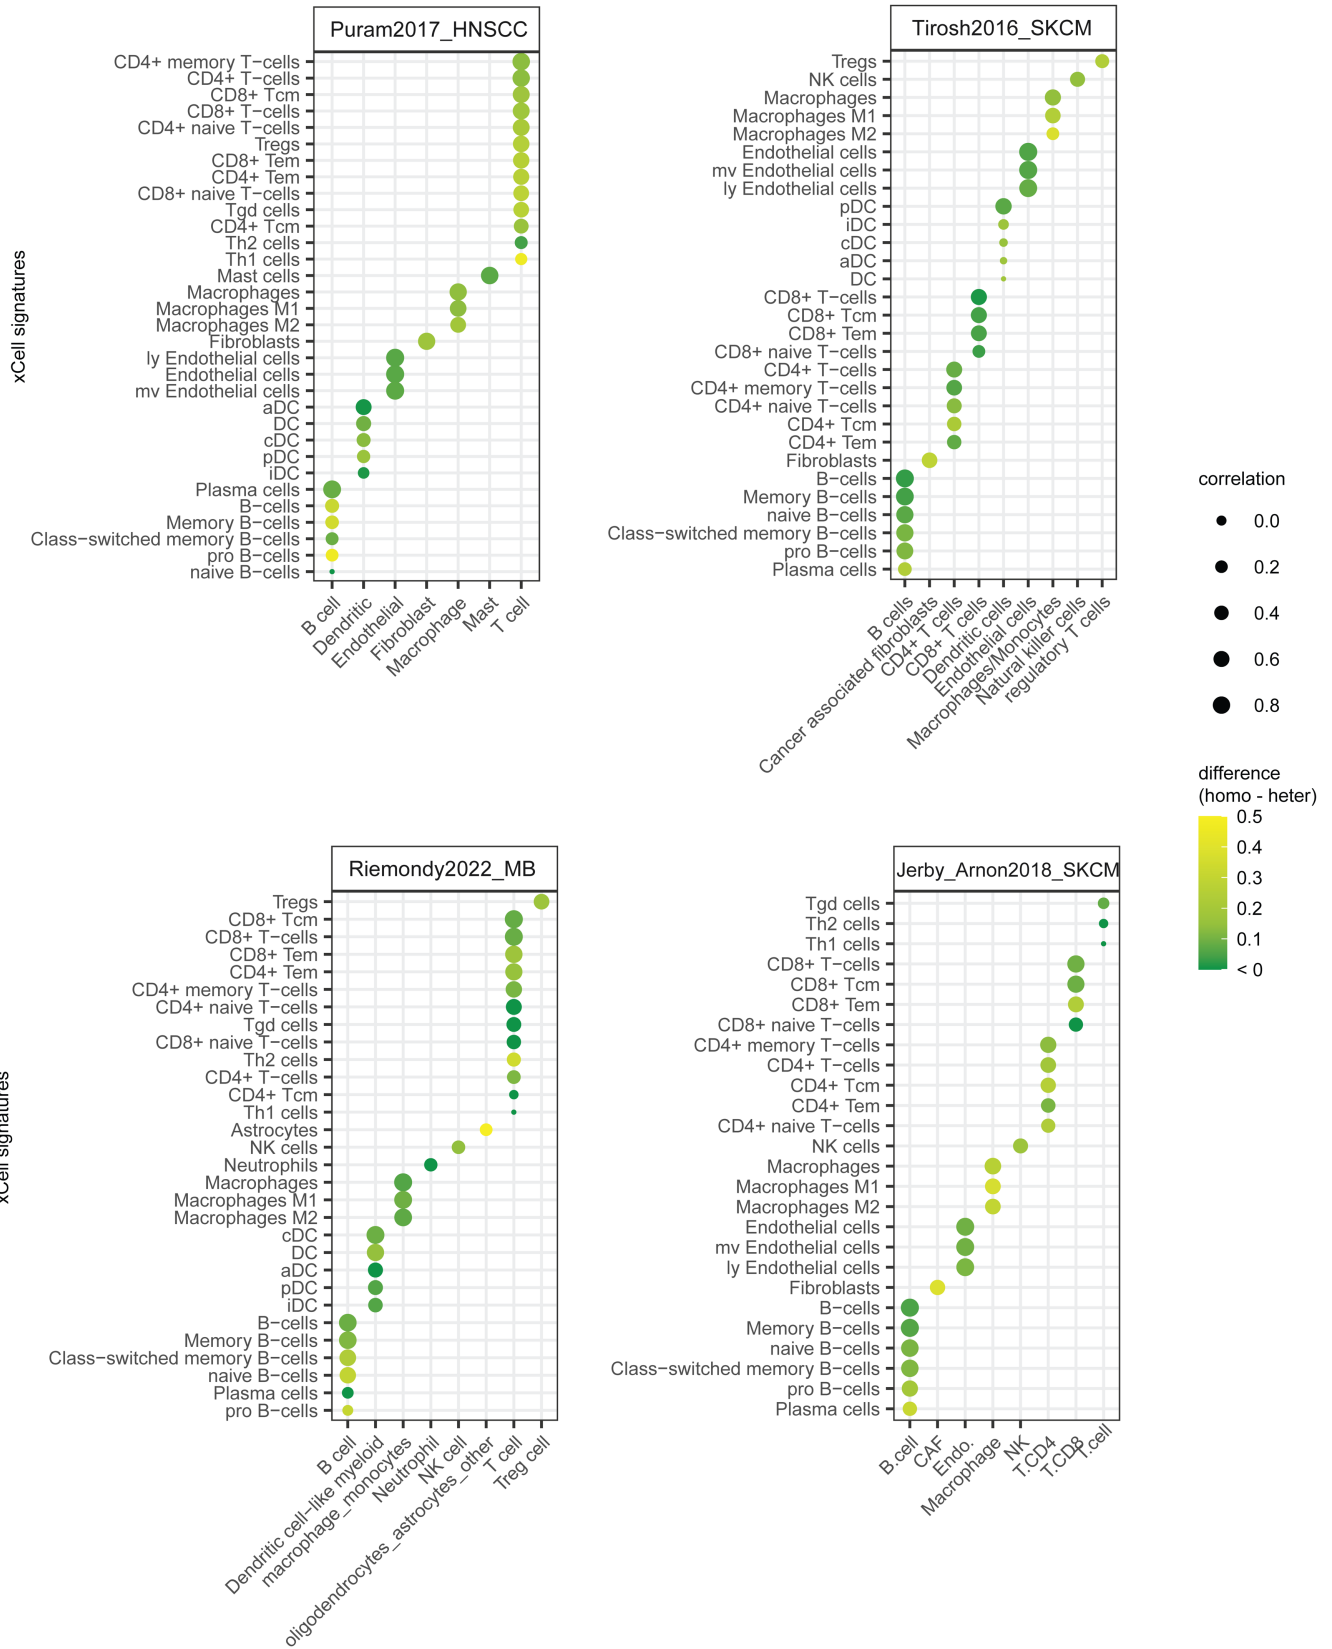



b

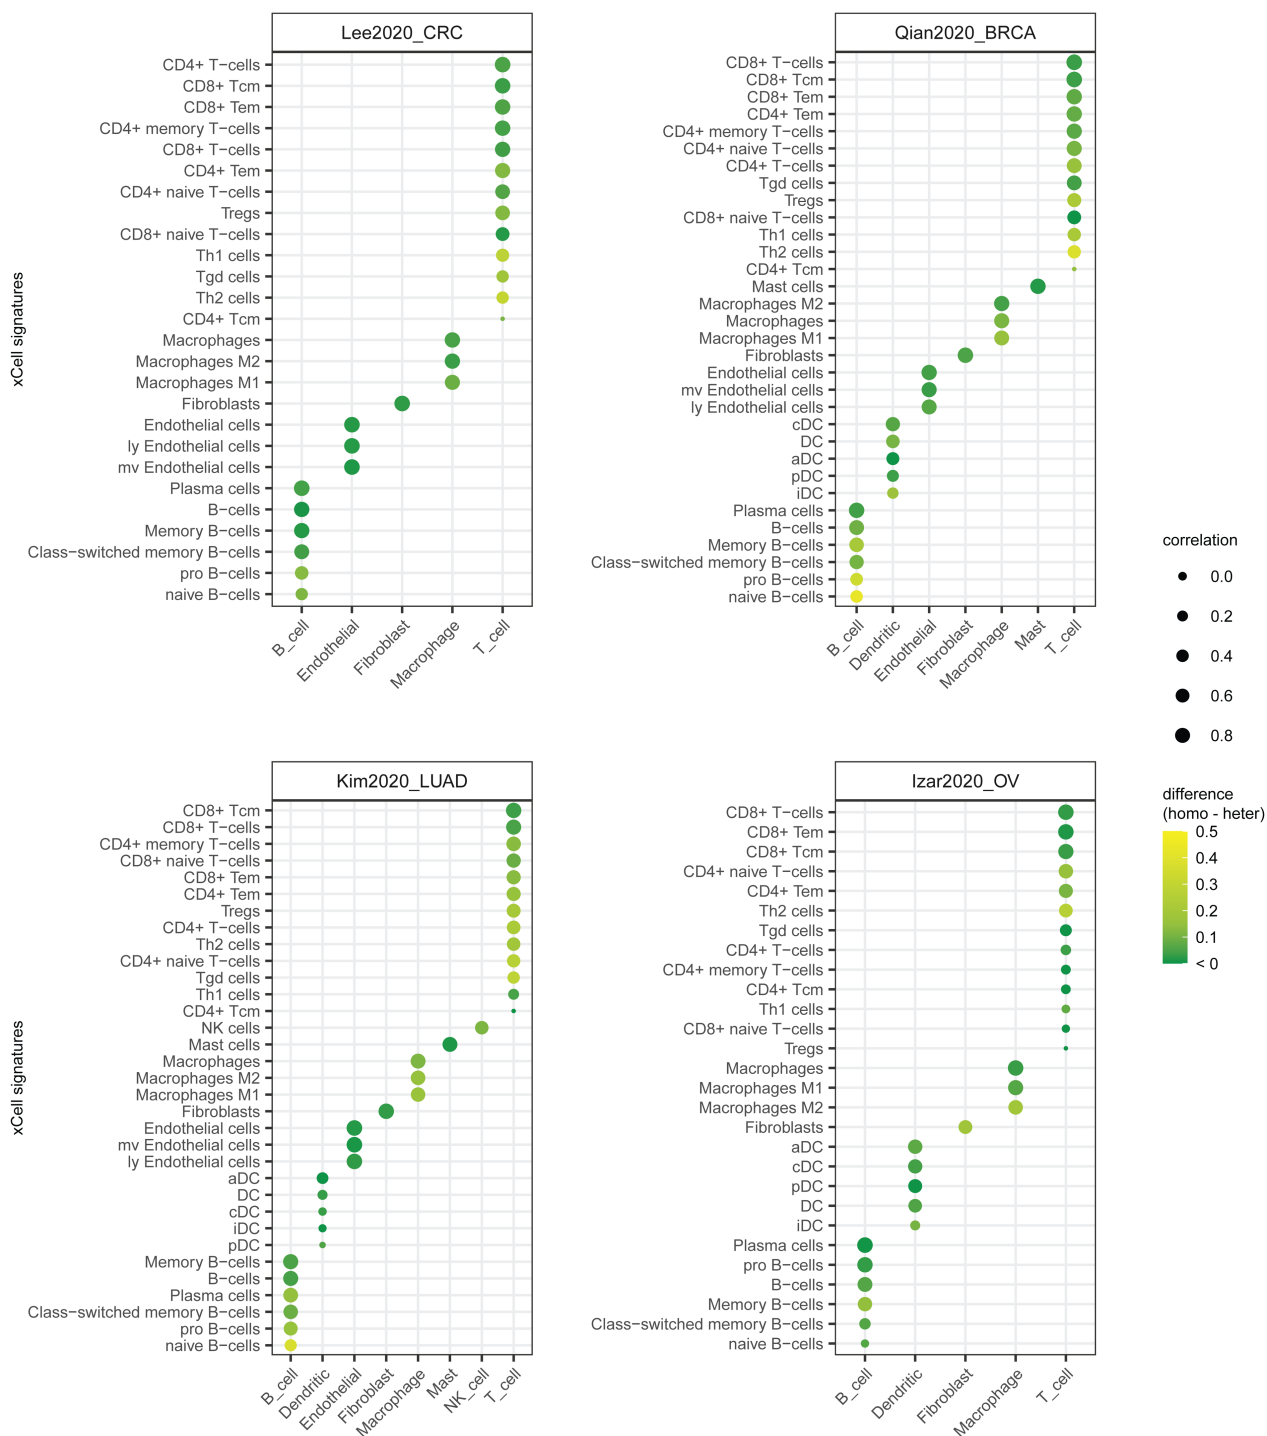

**Fig S14. Performance of marker-based method with built-in signatures: Pearson correlation of xCell signatures**  
 Dot plot showing the performance of xCell scores in estimating cell type abundance, with ground truth cell-type fractions on the x axis, and the estimated xCell signatures on the y axis. The dot size indicates per-cell type Pearson correlation for heter simulated bulk samples, and dot color reflects the difference in Pearson correlation between homo and heter simulated samples. The xCell signatures are specifically mapped to relevant cell types.

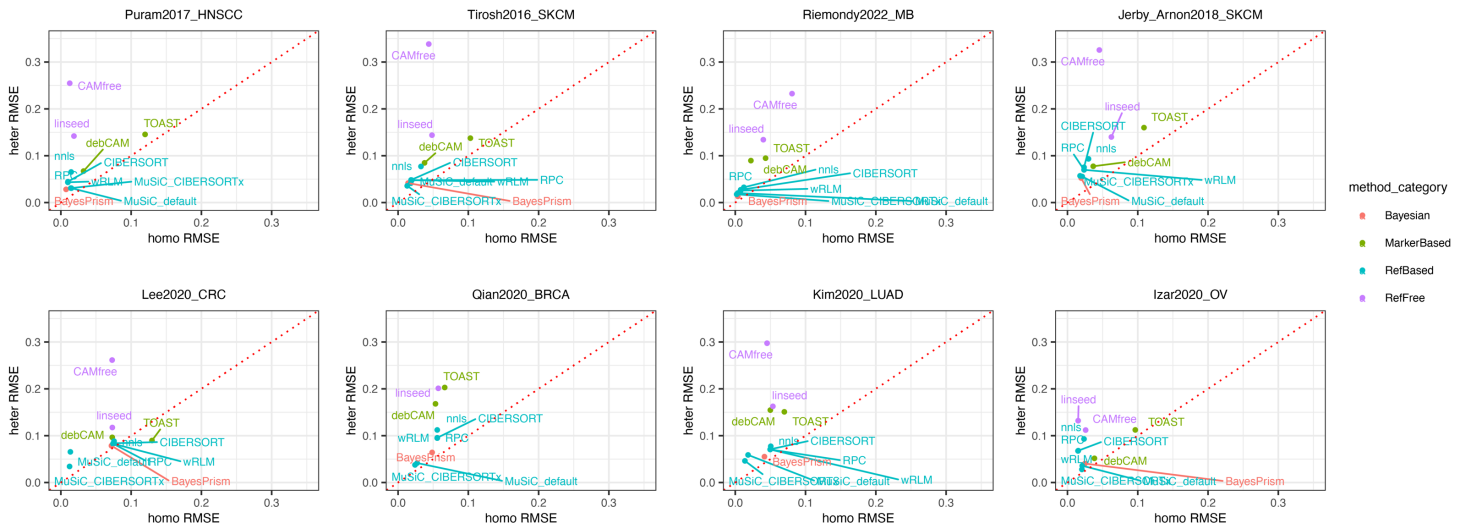

**Fig S15. Overall RMSE comparison under homogeneous and heterogeneous conditions**

Scatter plot comparing the average RMSE values of different deconvolution methods under homogeneous and heterogeneous simulations. Averages are calculated over 10 experimental repeats, with various colors representing different categories of deconvolution methods. All the regression-based methods are using CIBERSORTx derived reference matrix and all the marker-based methods are using scran derived markers, while “MuSiC\_default” means the default MuSiC setting where all the genes are being used as input.

a

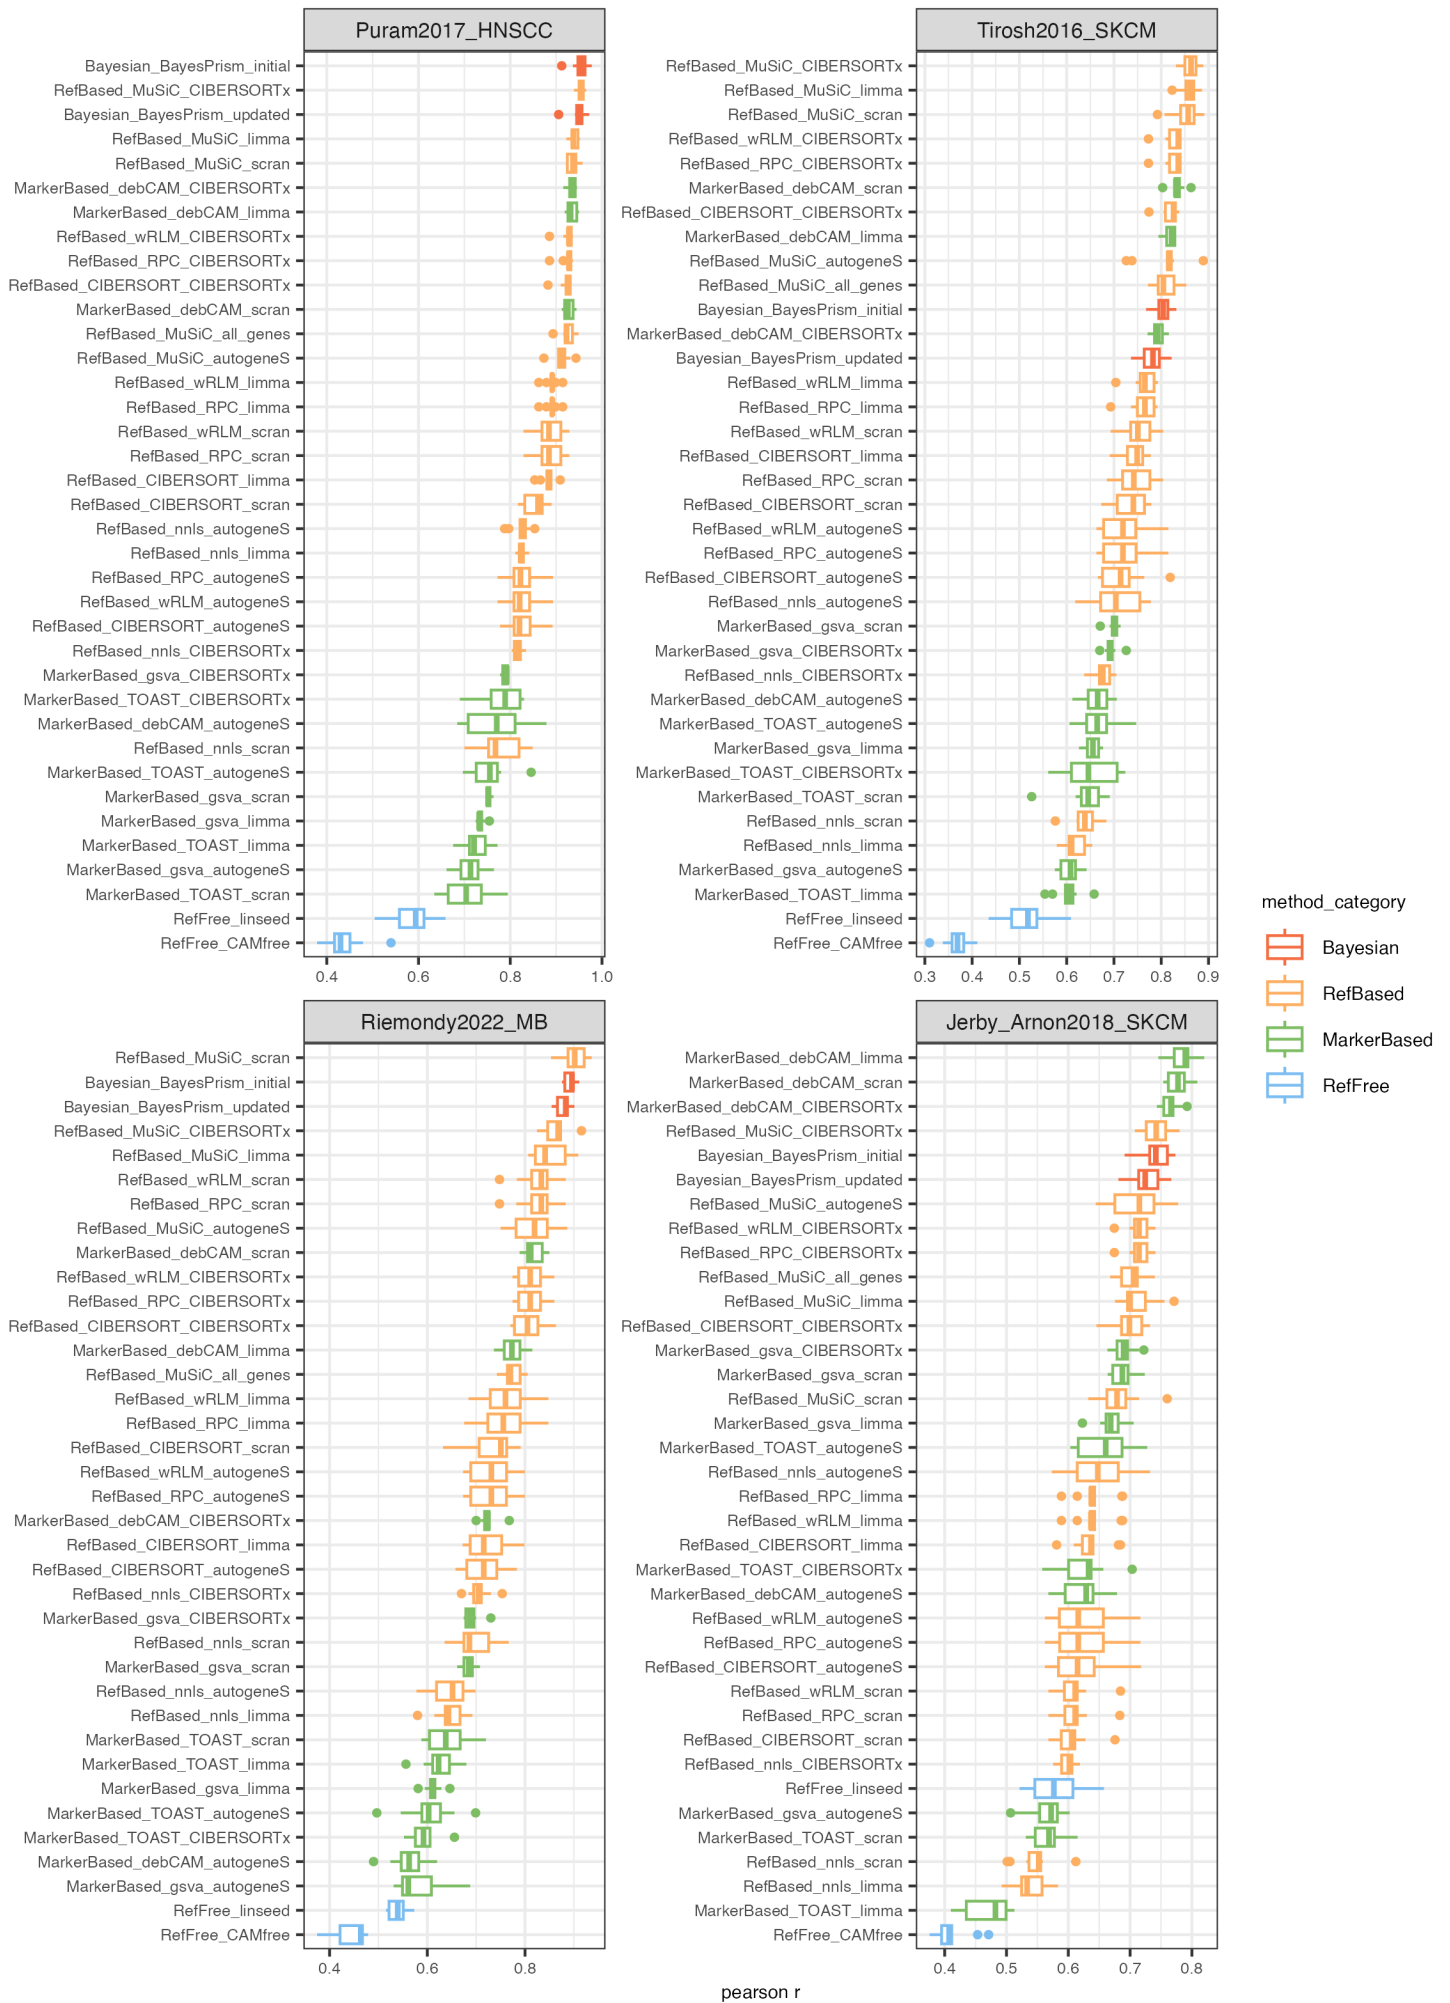

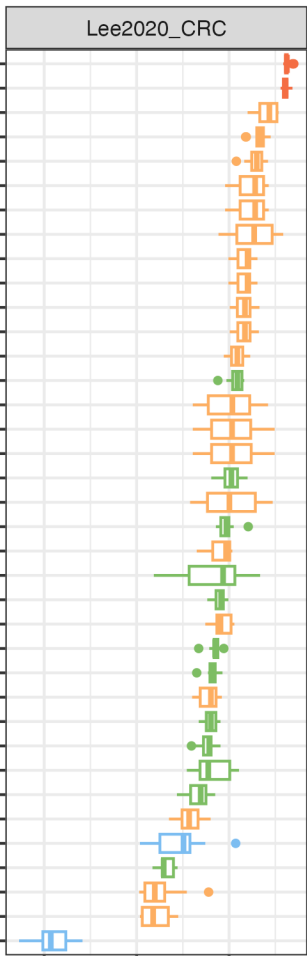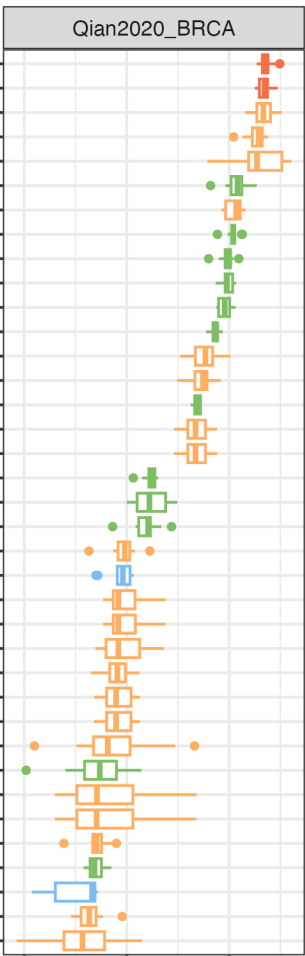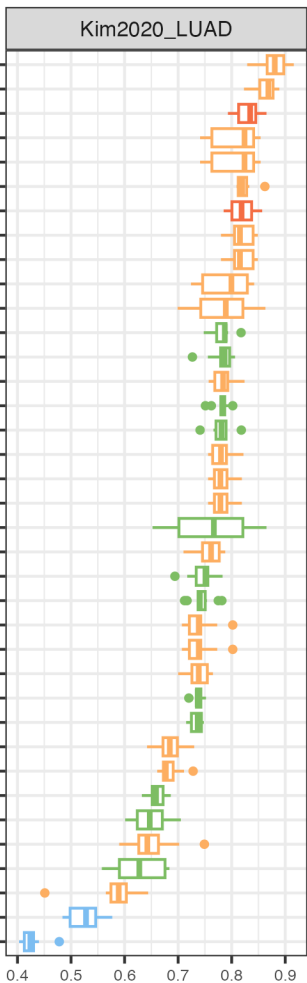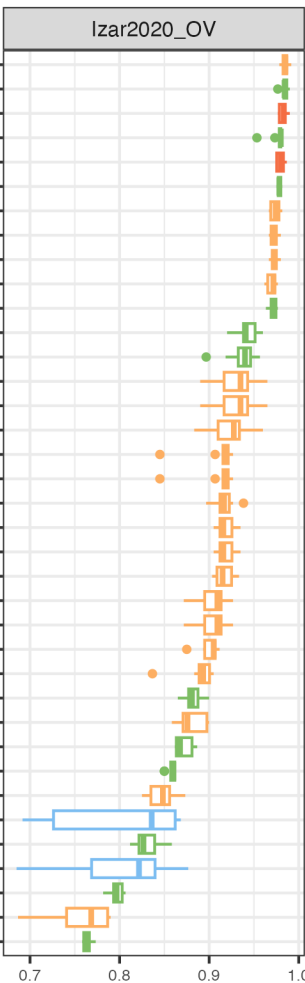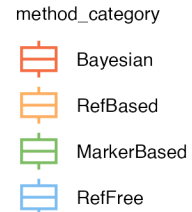

pearson r

b

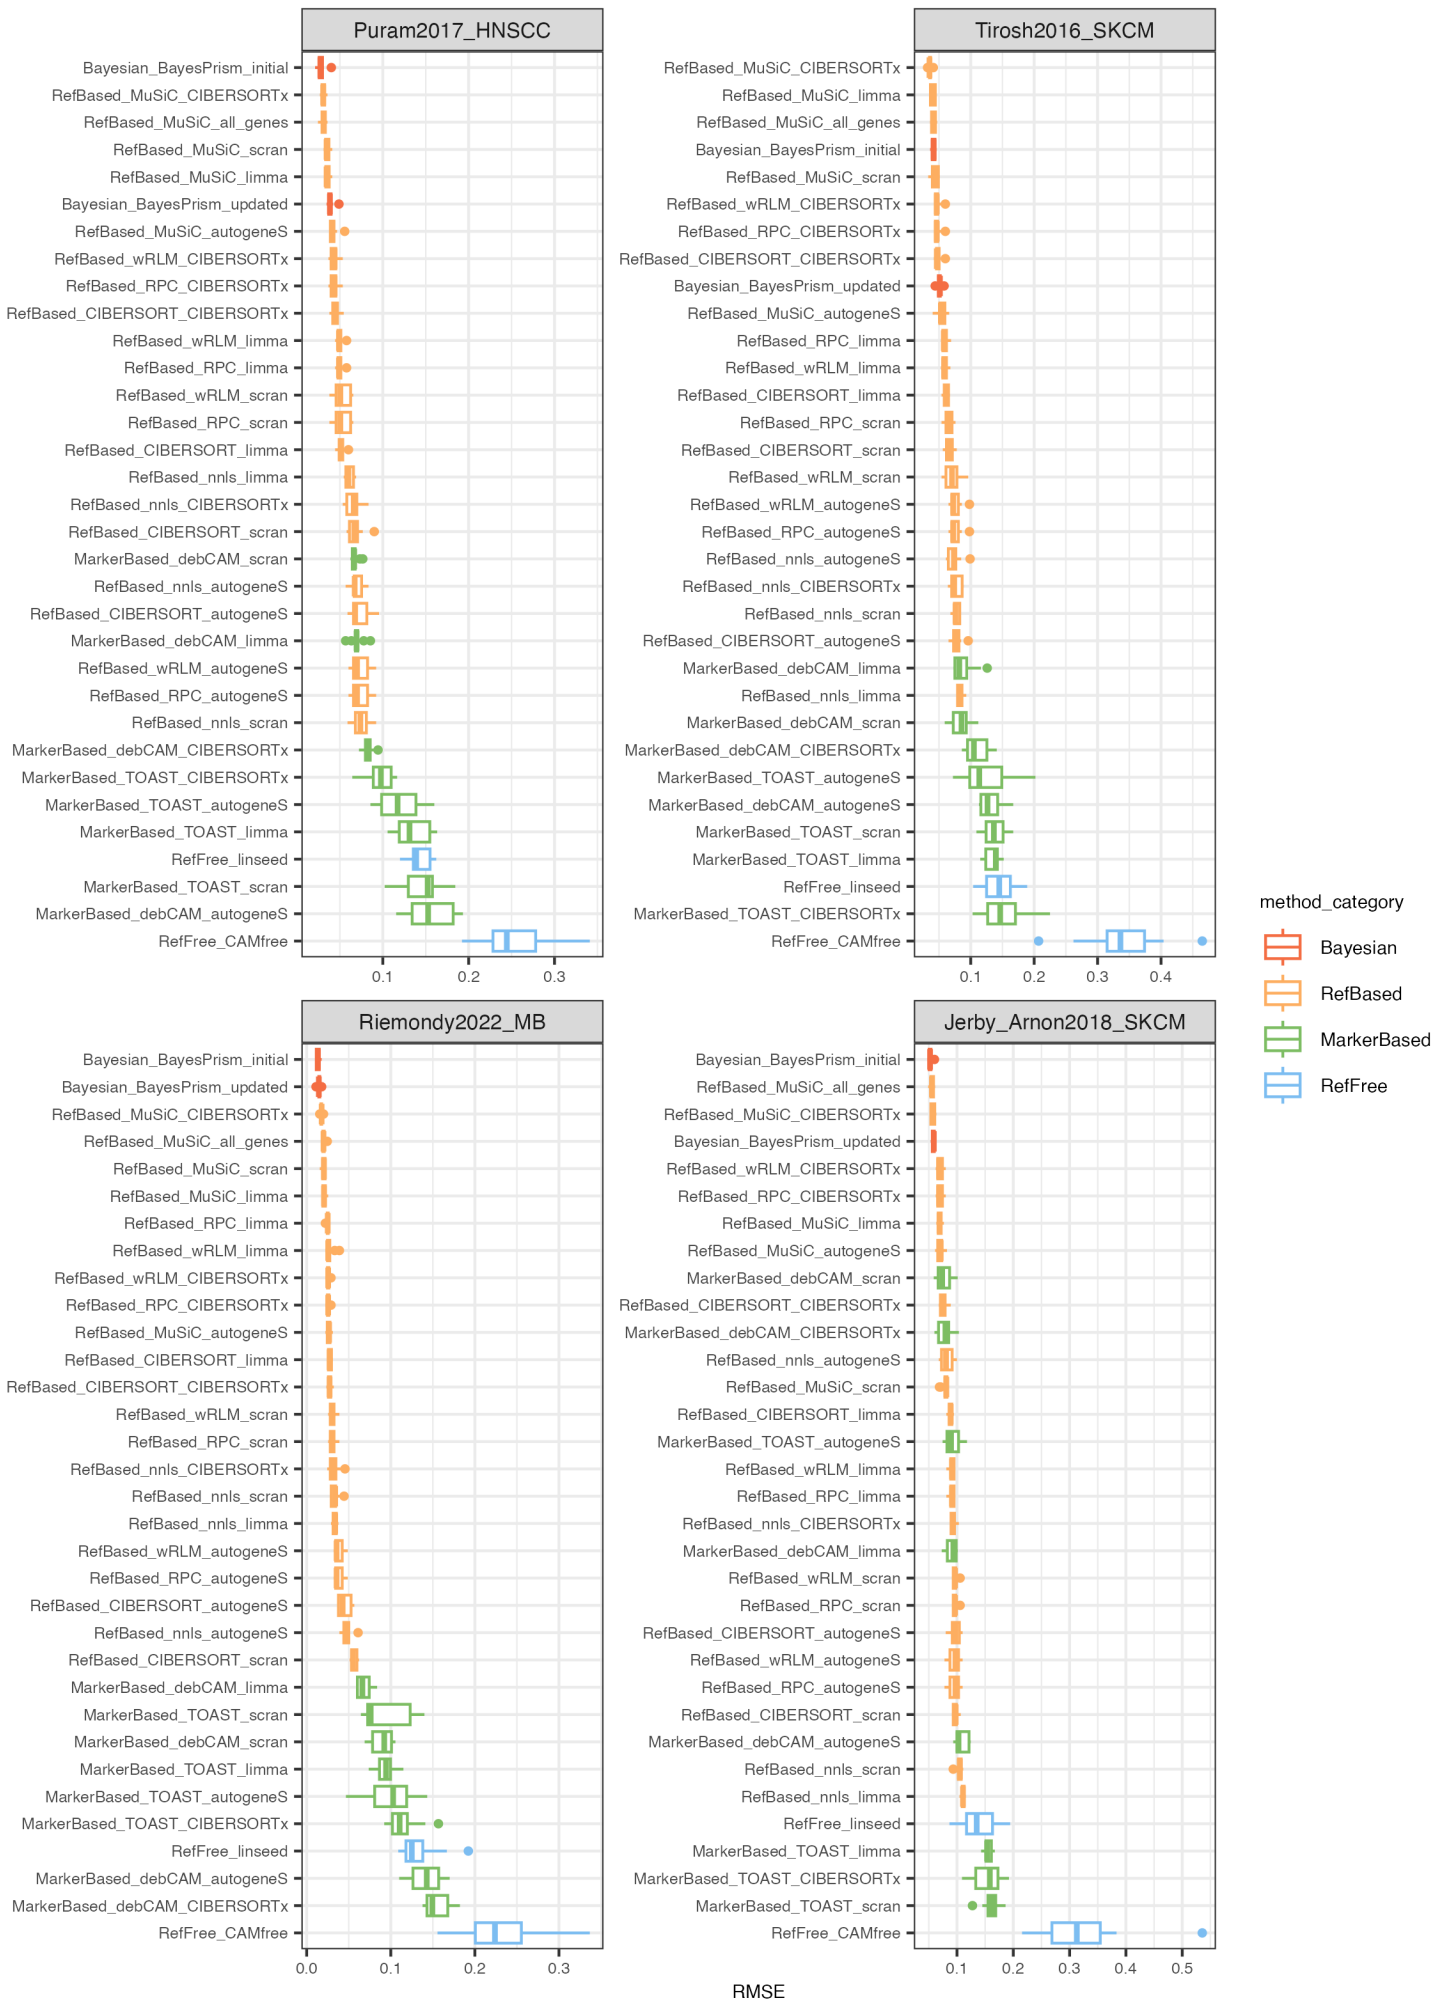

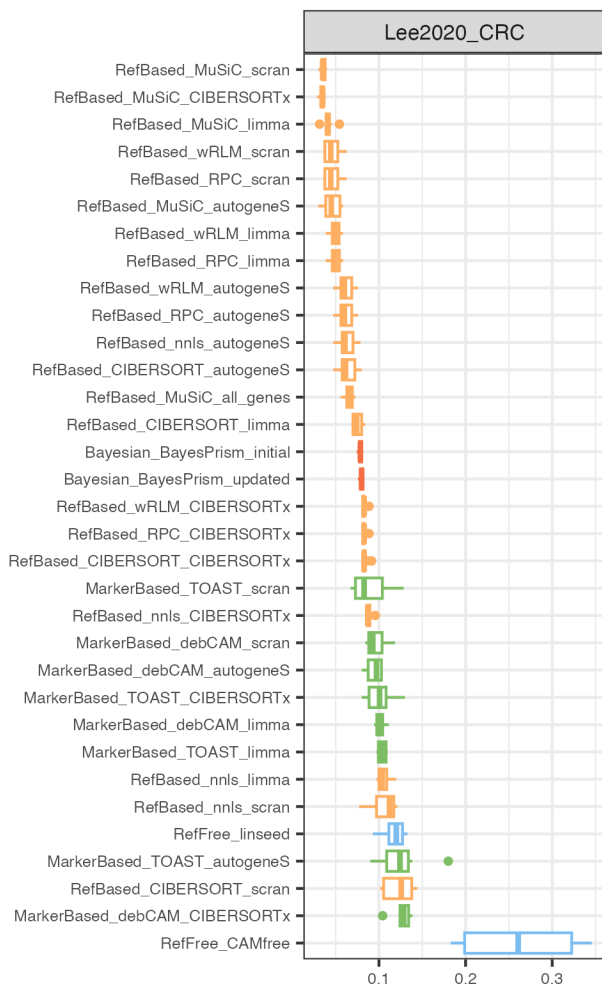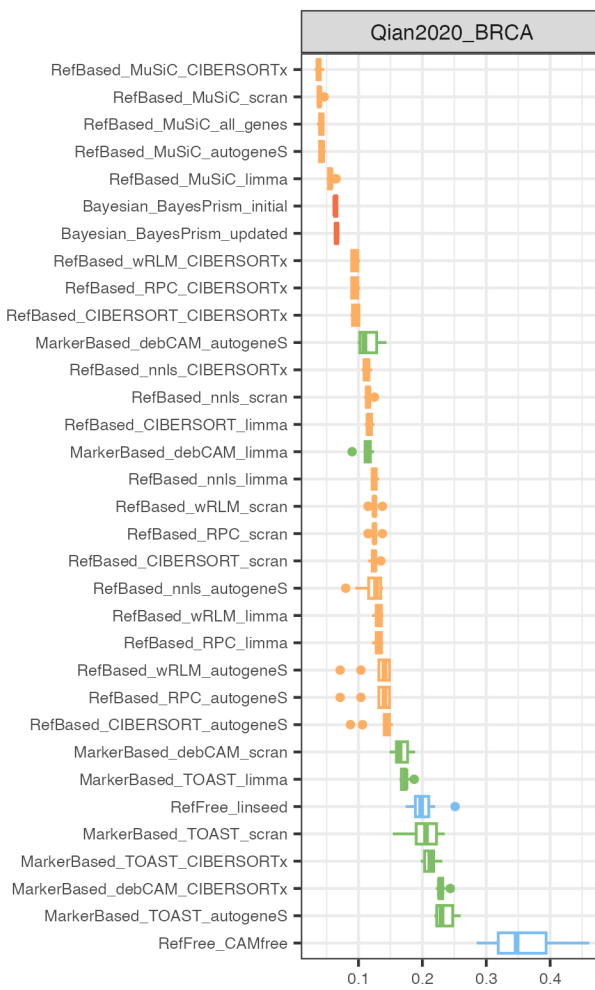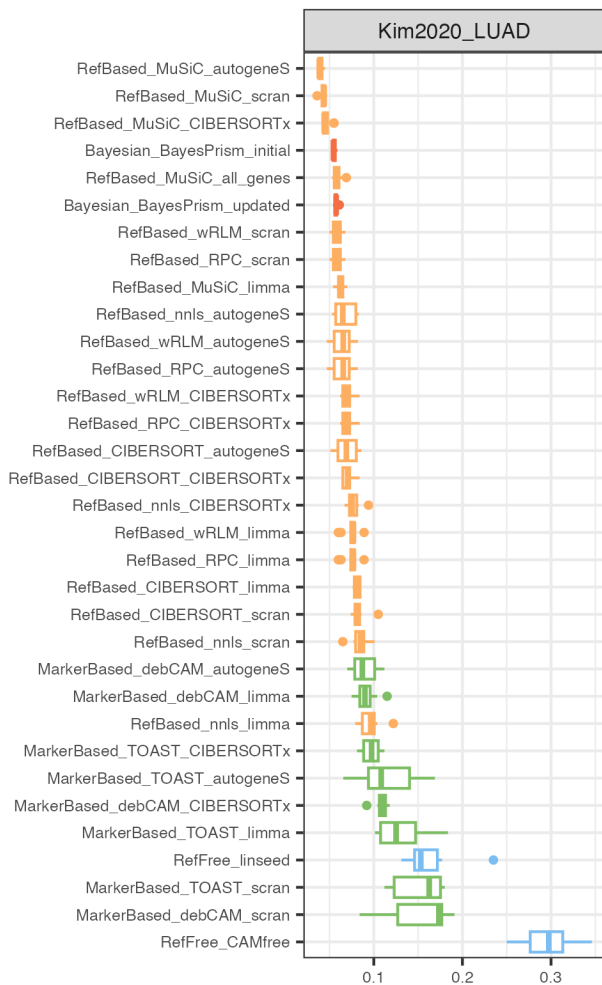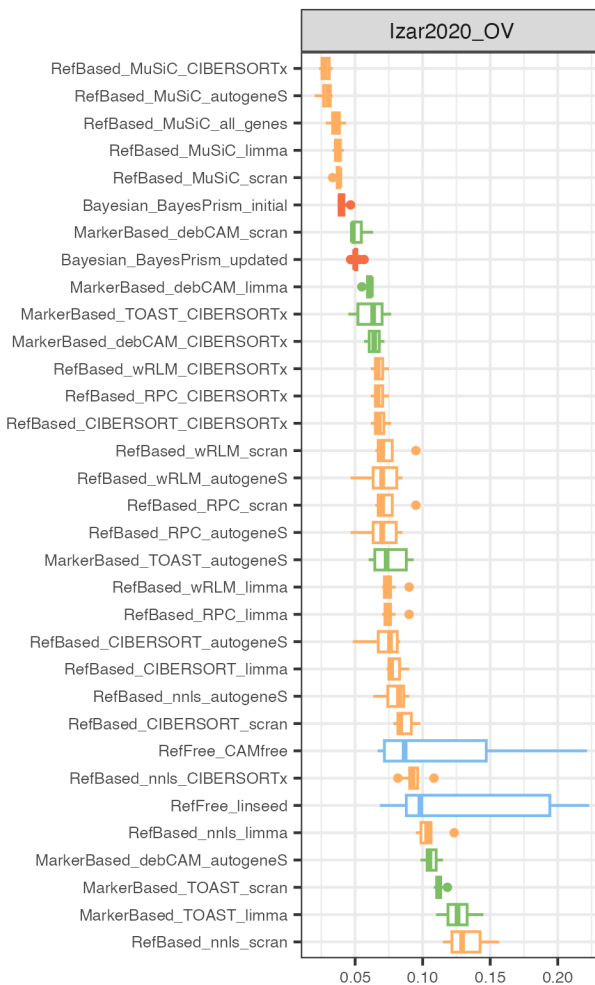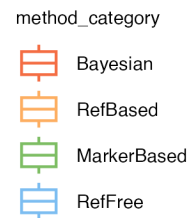

RMSE

**Fig S16. Detailed performance comparison under heterogeneous simulation**

Boxplot comparing the performance of all deconvolution methods under heterogeneous simulation strategy, as evaluated by (a) average Pearson correlation and (b) average RMSE values over 10 experimental repeats. The boxes are colored by different categories of deconvolution methods and the deconvolution methods are named using the format ‘deconvolution category\_’ + ‘deconvolution method’ format, followed by reference generation methods or updating methods when applicable.





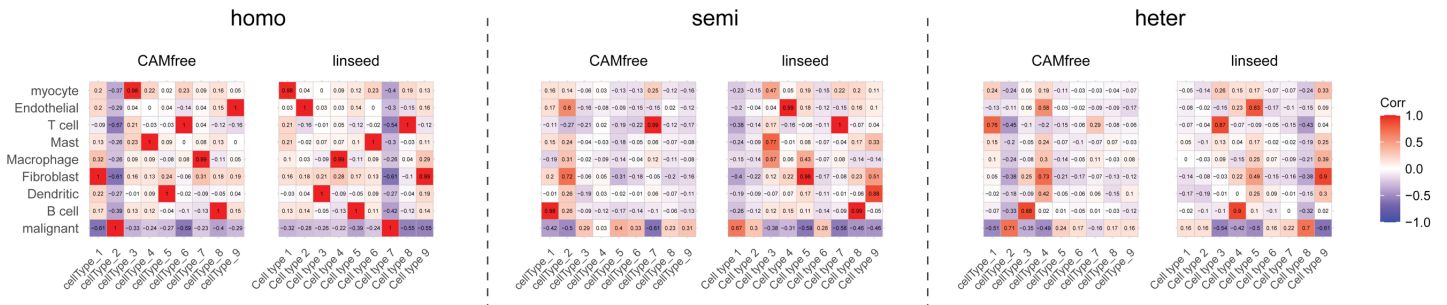

**Fig S18. Pairwise correlation between fraction estimates and ground truth fractions facilitates cell-type mapping in reference-free methods**

Heatmap depicting pairwise correlation between cell-type fractions and reference-free identified cell-type fractions under different simulation strategies from an example dataset.
